1 Quorum sensing N-Acyl homoserine lactones are a new class of anti-schistosomal.

2

3 Whiteland. H<sup>1</sup>, Crusco. A<sup>1</sup>, Bloemberg. LW<sup>1</sup>, Tibble-Howlings. J<sup>2</sup>, Forde-Thomas. J<sup>1</sup>,

4 Coghlan. A<sup>3</sup>, Murphy. P. J<sup>2</sup> and Hoffmann. KF<sup>1\*</sup>

5

6 <sup>1</sup> Institute of Biological, Environmental and Rural Sciences (IBERS), Aberystwyth

7 University, Aberystwyth, Wales, UK

8 <sup>2</sup> School of Natural Sciences, Bangor University, Gwynedd, LL57 2UW, UK

9 <sup>3</sup>Wellcome Sanger Institute, Wellcome Genome Campus, Hinxton, Cambridge CB10

10 1SA, UK

11

12 \* Corresponding Author:

13 Email: [krh@aber.ac.uk](mailto:krh@aber.ac.uk)

14 **Abstract**

15

16 **Background**

17 Schistosomiasis is a prevalent neglected tropical disease that affects approximately  
18 300 million people worldwide. Its treatment is through a single class chemotherapy,  
19 praziquantel. Concerns surrounding the emergence of praziquantel insensitivity have  
20 led to a need for developing novel anthelmintics.

21

22 **Methodology/Principle findings**

23 Through evaluating and screening fourteen compounds (initially developed for anti-  
24 cancer and anti-viral projects) against *Schistosoma mansoni*, one of three species  
25 responsible for most cases of human schistosomiasis, a racemic N-acyl homoserine  
26 (**1**) demonstrated good efficacy against all intra mammalian lifecycle stages including  
27 schistosomula ( $EC_{50} = 4.7 \mu M$ ), juvenile worms ( $EC_{50} = 4.3 \mu M$ ) and adult worms ( $EC_{50}$   
28  $= 8.3 \mu M$ ). To begin exploring structural activity relationships, a further 8 analogues  
29 of this compound were generated, including individual (*R*)- and (*S*)- enantiomers.  
30 Upon anti-schistosomal screening of these analogues, the (*R*)- enantiomer retained  
31 activity, whereas the (*S*)- lost activity. Furthermore, modification of the lactone ring to  
32 a thiolactone ring (**3**) improved potency against schistosomula ( $EC_{50} = 2.1 \mu M$ ),  
33 juvenile worms ( $EC_{50} = 0.5 \mu M$ ) and adult worms ( $EC_{50} = 4.8 \mu M$ ). As the active  
34 racemic parent compound is structurally similar to quorum sensing signaling peptides  
35 used by bacteria, further evaluation of its effect (along with its stereoisomers and the  
36 thiolactone analogues) against Gram<sup>+</sup> (*Staphylococcus aureus*) and Gram<sup>-</sup>  
37 (*Escherichia coli*) species was conducted. While some activity was observed against  
38 both Gram<sup>+</sup> and Gram<sup>-</sup> bacteria species for the racemic compound **1** (MIC 125 mg/L),

39 the (*R*) stereoisomer had better activity (125 mg/L) than the (*S*) (>125mg/L). However,  
40 the greatest antimicrobial activity (MIC 31.25 mg/L against *S. aureus*) was observed  
41 for the thiolactone containing analogue (**3**).

42

### 43 **Conclusion/Significance**

44 To the best of our knowledge, this is the first demonstration that N-Acyl homoserines  
45 exhibit anthelmintic activities. Furthermore, their additional action on Gram<sup>+</sup> bacteria  
46 opens a new avenue for exploring these molecules more broadly as part of future anti-  
47 infective initiatives.

48

49 Key words: N-Acyl homoserine lactones, *Schistosoma mansoni*, anthelmintic,  
50 antimicrobial

## 51 **Author Summary**

52 Schistosomiasis, caused by infection with blood fluke schistosomes, is a neglected  
53 tropical disease that negatively impacts the lives of approximately 300 million people  
54 worldwide. In the absence of a vaccine, it is currently controlled by a single drug,  
55 Praziquantel (PZQ). Although incredibly valuable in controlling disease burden, PZQ-  
56 mediated chemotherapy is ineffective against juvenile worms and may not be  
57 sustainable should resistance develop. The need to identify an alternative or  
58 combinatorial drug is, therefore, a priority in contributing to the control of this parasitic  
59 disease into the 21<sup>st</sup> century. In this study, we have identified a new class of  
60 anthelmintic, N-acyl homoserine lactones, which are normally used by bacteria for  
61 quorum sensing and population density control. The tested N-acyl homoserine  
62 lactones were active against all intra-human schistosome lifecycle stages, in  
63 particular, when a thiolactone modification to the core N-acyl homoserine ring was  
64 made. Interestingly, these N-acyl homoserine lactones also displayed antimicrobial  
65 activities against Gram<sup>+</sup> *Staphylococcus aureus*. By demonstrating broad activities  
66 against schistosomes and bacteria exemplars, this study identified a potential route  
67 for the further development of a new anti-infective class.

## 68 **Introduction**

69

70 The development of drug resistant prokaryotic and eukaryotic pathogens is of great  
71 concern for the sustainable control of both human and animal diseases; therefore, the  
72 need for new anti-infectives is a global health priority. One notorious group of difficult  
73 to control pathogens are those that cause the Neglected Tropical Diseases (NTDs). In  
74 total, 17 parasites/microbes and their related infections are now identified as  
75 responsible for most NTDs worldwide [1], with schistosomiasis, leishmaniasis and soil-  
76 transmitted helminthiasis causing significant disability adjusted life years lost per  
77 annum [2]. As vaccines are unavailable for the prevention of most NTDs, a small  
78 number of chemotherapies remain the primary means of global control. However, drug  
79 resistance or reduced susceptibility to these limited drug classes has been reported  
80 for NTD-causing bacteria [3], fungi [4], helminths [5, 6] and protozoa [7, 8]. These  
81 chemotherapy limitations have prompted an urgent need for research into the  
82 development of new anti-infective agents. Nevertheless, funding to support this  
83 agenda is unlikely to originate from the pharmaceutical sector due to the lack of  
84 financial returns associated with controlling diseases predominantly affecting low to  
85 middle-income countries [9-11]. Thus, philanthropic and public organisations are often  
86 driving the majority of new anti-infective initiatives targeting the NTDs with derived  
87 funding supporting research conducted in higher education or research institutes.

88

89 One particular debilitating NTD, schistosomiasis, affects over 300 million people  
90 worldwide [12] and is predominantly caused by infection with three *Schistosoma*  
91 species [13]. Therapeutic treatment involves praziquantel (PZQ) as the frontline  
92 control strategy. However, PZQ is ineffective against the juvenile stage of the parasite

93 *in vivo*, which necessitates repeat administrations to reach maximal efficacy in  
94 endemic populations [14]. Furthermore, PZQ is currently produced as a racemic  
95 mixture and only the (*R*) - enantiomer is active; the (*S*) - enantiomer contributes to  
96 some of the side effects including bitter taste and non-compliance in the young [15].  
97 These drug-related limitations, together with a constant fear of PZQ resistance  
98 developing, has fuelled investigations into the identification of PZQ replacement or  
99 combinatorial anti-schistosomal drugs.

100

101 Towards this goal, our group has recently identified several diverse starting points for  
102 anti-schistosomal drug discovery. These include diterpenoids [16, 17], triterpenoids  
103 [18], and epigenetic probes/inhibitors [19, 20]. While the primary focus of these  
104 investigations evaluated compound-induced activity on *Schistosoma mansoni* (the  
105 schistosome species responsible for both Old and New world schistosomiasis),  
106 parallel studies were also conducted to quantify anti-infective activities against other  
107 NTD-causing pathogens including *Fasciola hepatica* (liver fluke) [16-18] or NTD  
108 models such as *Mycobacterium smegmatis* (related to *Mycobacterium leprae*) [21].

109

110 In this present study, we assessed the anti-schistosomal activity of 14 in house  
111 prepared synthetic compounds (or intermediate analogues of these compounds). As  
112 the most active anti-schistosomal compounds were structurally similar to N-acyl  
113 homoserines, a class of signalling molecule involved in bacterial quorum sensing and  
114 population density control [22], we additionally investigated their anti-microbial activity.  
115 Amongst the compounds tested, one demonstrated moderate activity against Gram<sup>+</sup>  
116 (*Staphylococcus aureus*) bacteria. Our collective results demonstrate that N-acyl  
117 homoserines represent a new class of anthelmintics with additional activity against

- 118 bacteria. Further development of these molecules could be pursued as promising new  
119 chemotherapeutics for schistosomiasis and other NTDs.

## 120 **Materials and Methods**

121

## 122 **Ethics statement**

123 All procedures performed on mice (project licenses 40/3700 and P3B8C46FD)  
124 adhered to the United Kingdom Home Office Animals (Scientific Procedures) Act of  
125 1986 as well as the European Union Animals Directive 2010/63/EU and were  
126 approved by Aberystwyth University's (AU) Animal Welfare and Ethical Review Bodies  
127 (AWERB).

128

## 129 **Synthetic Methodology**

130 Lactones (compounds **1-9**) were prepared by the reaction of the lactone/thiolactone,  
131 with the required acyl halide in the presence of NEt<sub>3</sub> in chloroform or potassium  
132 carbonate in a two phase water/chloroform mix (Scheme 1). Yields and conditions are  
133 shown in Table 1 and full synthetic and spectroscopic details are found in S1 Protocol.

134

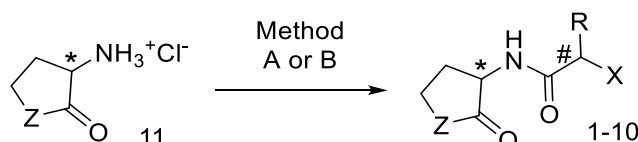

135 Scheme 1: Method A: NEt<sub>3</sub>, CHCl<sub>3</sub>, 0°C; Method B: K<sub>2</sub>CO<sub>3</sub>, CH<sub>2</sub>Cl<sub>2</sub>/H<sub>2</sub>O, 0°C. R = H.  
136 Me, X = O, S.\* Chiral centres

137 **Table 1:** Preparatory summary of compounds **1-9**.

| Compound | X  | Z | R  | *        | #       | Method | Yield | Mp/°C  |
|----------|----|---|----|----------|---------|--------|-------|--------|
| <b>1</b> | Br | O | H  | Racemic  | NA      | A      | 75%   | 95-97  |
| <b>2</b> | Br | O | Me | Racemic  | Racemic | A      | 33%   | 157-69 |
| <b>3</b> | Br | S | H  | Racemic  | NA      | B      | 40%   | 111-3  |
| <b>4</b> | Br | S | Me | Racemic  | Racemic | B      | 73%   | 125-28 |
| <b>5</b> | Br | O | H  | <i>R</i> | NA      | B      | 25%   | 130-3  |
| <b>6</b> | Br | O | H  | <i>S</i> | NA      | B      | 14%   | 130-3  |



|          |    |   |    |         |         |   |     |        |
|----------|----|---|----|---------|---------|---|-----|--------|
| <b>7</b> | Cl | O | H  | Racemic | NA      | A | 68% | 111-5  |
| <b>8</b> | Cl | S | H  | Racemic | NA      | B | 61% | 124-7  |
| <b>9</b> | Cl | O | Me | Racemic | Racemic | A | 65% | 148-50 |

138

139 The symbols “\*” and “#” refer to the absolute configuration at the carbon centres  
140 indicated in scheme 1.

141 NA= Not applicable

142 Z = O, S, R = H, Me.

143

#### 144 **Compound storage and handling**

145 All compounds were solubilised in DMSO (Fisher Scientific, UK) to a stock  
146 concentration of 10 mM and stored at -20°C until required. Positive controls for *S.*  
147 *mansoni* screens included PZQ (Sigma-Aldrich, UK) and auranofin (Sigma-Aldrich,  
148 UK), which were also treated in the same manner as the test compounds.

149

#### 150 **Screening of *S. mansoni* schistosomula**

151 *Biomphalaria glabrata* (NMRI and the previously described pigmented strains [23])  
152 snails infected with *S. mansoni* (Puerto Rican strain) were shed for 2 hrs under light  
153 at 26 °C. Cercariae were collected, mechanically transformed into schistosomula [24]  
154 and subsequently prepared for high throughput screening (HTS) on the Roboworm  
155 platform as previously described [25]. Compounds were initially tested at a final  
156 concentration of 10 µM and those that were active were further titrated at  
157 concentrations of 10, 5, 2.5, 1.25 and 0.625 µM. EC<sub>50</sub> values were calculated from the  
158 titrated concentrations by non-linear regression, after log transformation of  
159 concentrations and data normalization using GraphPad Prism 7.02.

160

#### 161 **Screening of adult *S. mansoni* blood flukes (7-week worms)**

162 Adult *S. mansoni* parasites were recovered by hepatic portal vein perfusion from TO  
163 mice (Harlan, UK) that were percutaneously infected seven weeks earlier with 180  
164 cercariae. Three adult worm pairs per well, in duplicate, were transferred into 48 well  
165 plates (Fisher Scientific, Loughborough, UK) and cultured at 37 °C in an atmosphere  
166 containing 5% CO<sub>2</sub> in DMEM (Gibco, Paisley, UK) containing 10% v/v HEPES, 10%  
167 v/v Foetal Bovine Serum (FBS), 0.7% v/v 200 mM L-Glutamine and 1X v/v penicillin-  
168 streptomycin. Worms were dosed with test compounds at 20 µM, 10 µM, 5 µM, 2.5  
169 µM, 1.25 µM and 0.625 µM (in 0.2% DMSO) for 72 hr. Adult worms were scored  
170 manually at 72 hr using the WHO-TDR metric scoring system as described previously  
171 [26]. Dose response curves and EC<sub>50</sub> values were obtained by non-linear regression,  
172 after log transformation of concentrations and data normalization using GraphPad  
173 Prism 7.02. At 72 hr, the medium from each well was also collected, centrifuged at  
174 1000 rpm for 2 min. Afterwards, the supernatant was removed, and the remaining egg  
175 pellet re-suspended in 10% v/v formalin. Eggs that were oval and contained a fully  
176 formed lateral spine were subsequently counted.

177

### 178 **Screening of juvenile *S. mansoni* blood flukes (3-week worms)**

179 Juvenile *S. mansoni* parasites were recovered via hepatic portal vein perfusion from  
180 TO mice (Harlan, UK) that were infected percutaneously three weeks earlier with 4000  
181 cercariae. Preparation and centrifugation of juvenile worms have been described  
182 previously [18]. Briefly, juvenile worms (n=13-33 individuals/well) in 200 µl of a 96-well  
183 tissue culture plate were co-cultured with compounds (15 µM, 7.5 µM, 3.75 µM, 1.83  
184 µM, 0.94 µM and 0.47 µM (in 1.25% DMSO) in DMEM (Gibco, Paisley, UK)  
185 supplemented with 10% v/v HEPES (Sigma-Aldrich, Gillingham, UK), 10% v/v FBS  
186 (Gibco, Paisley, UK), 0.7 % v/v 200 mM L-Glutamine (Gibco, Paisley, UK) and 1X v/v

187 penicillin-streptomycin (Fisher Scientific, UK). Positive control wells included either  
188 PZQ or auranofin (15  $\mu$ M in 1.25% DMSO) whereas negative wells included DMSO  
189 (1.25%). Parasites were incubated at 37 °C in an atmosphere containing 5% CO<sub>2</sub> for  
190 72 hr at which time worm motility was scored between 0 and 4: 0 = dead, 1 =  
191 movement of the suckers only and slight contraction of the body, 2 = movement at the  
192 anterior and posterior regions only, 3 = full body movement but sluggish and 4 =  
193 normal movement. After motility quantification, 2  $\mu$ g/mL of PI was added to each well  
194 and the plate returned to 37°C, 5% CO<sub>2</sub> for 15 minutes [27]. Each well was  
195 subsequently imaged on the Roboworm platform using brightfield and fluorescent  
196 microscopy (excitation wavelength = 580 nm; emission wavelength = 604 nm). The  
197 number of PI positive vs PI negative juvenile worms were cross-checked with the  
198 motility scores obtained by our scoring matrix, and the data reported as percentage of  
199 PI positive across all parasites within the well. EC<sub>50</sub> values were calculated from the  
200 motility scores obtained from the dose response titration (as detailed above) and dose  
201 response curves were obtained by non-linear regression, after log transformation of  
202 concentrations and data normalization using GraphPad Prism 7.02.

203

## 204 **Cell Cytotoxicity Assays**

205 The cytotoxicity of each compound was assessed on human HepG2 cells as described  
206 previously [25]. Briefly, 2 x 10<sup>4</sup> cells/well were seeded in black walled 96-well microtiter  
207 plates (Fisher Scientific, Loughborough, UK) and incubated for 24 hr at 37°C in a  
208 humidified atmosphere containing 5% CO<sub>2</sub>. To each well, compounds were  
209 subsequently added to obtain final concentrations (in 1% DMSO) of 100  $\mu$ M, 75  $\mu$ M,  
210 50  $\mu$ M, 25  $\mu$ M, 10  $\mu$ M and 5  $\mu$ M. Following a further incubation for 24 hr, the MTT  
211 assay was performed as previously described [25, 28]. Dose response curves were

212 obtained by non-linear regression, after log transformation of concentrations and data  
213 normalization using GraphPad Prism 7.02.

214

## 215 **Bacterial Growth, Minimum Inhibitory Concentration (MIC) Calculation, and EC<sub>50</sub>** 216 **Determination**

217 *S. aureus* ATCC 29213 and *E. coli* ATCC 25922 were cultured in Luria-Bertani (LB)  
218 medium at 37 °C with aeration at 200 rpm for 24 hr, with all procedures performed in  
219 a biosafety level 2 (BSL2) cabinet. Stationary phase cultures were then used for  
220 minimum inhibitory concentration (MIC) determination using the broth microdilution  
221 method, in fresh LB medium, in a 96-well plate [29]. All compounds were tested in  
222 triplicate using an initial bacterial concentration of  $5.0 \times 10^5$  colony forming units  
223 (CFU)/mL at a final concentration of 125 mg/L (5% and 2.5% v/v methanol).  
224 Compounds with no visible growth at 125 mg/L were further evaluated with  
225 progressing dilutions. The MIC was determined as the lowest concentration of a  
226 compound at which no growth was visible after 24 hr. Dilutions were repeated in three  
227 independent experiments where the optical density (OD<sub>600</sub>) was measured in a Hidex  
228 plate spectrophotometer and absorbance data used for the calculation of an  
229 IC<sub>50</sub> value. The EC<sub>50</sub> value was obtained from a dose response titration (125–0.09  
230 mg/L). Dose response curves were obtained by non-linear regression, after log  
231 transformation of concentrations and data normalization using GraphPad Prism 7.02.

232

## 233 **Bioinformatics**

234 The names and structures (SMILES strings) of chemical compounds were identified  
235 in PubMed abstracts in June 2019 using the chemistry text-mining software LeadMine  
236 v 3.1.2 (NextMove Software Ltd.) [30]. Chemical compounds were identified in all

237 PubMed abstracts containing any one of long list of words relating to schistosomes  
238 and anthelmintic/antiparasitic compounds (e.g. 'schistosoma', 'sporocyst',  
239 'sporocysts', 'miracidium', 'miracidia', 'somule', 'somules', 'schistosomula',  
240 'schistosomulum', 'cercariae', 'cercaria', 'schistosome', 'schistosomes', 'antiparasitic',  
241 'antinematodal', 'anthelmintic', etc.). The structures of our screening hits were  
242 compared to those of the chemical compounds identified in PubMed abstracts using  
243 DataWarrior [31], by using DataWarrior's Similarity Analysis function with its FragFP  
244 descriptor.

245  
246 A map of the quorum sensing pathway in *Pseudomonas aeruginosa* was found using  
247 the Kyoto Encyclopedia of Genes and Genomes (KEGG) database. Through this  
248 database, the NCBI Protein IDs and the corresponding amino acid sequences were  
249 obtained for LasR (NP\_250121), LasI (NP\_250123), RhIR (NP\_252167), RHII  
250 (NP\_252166). These sequences were used as queries for a protein BLAST (BLASTp)  
251 search against the *S. mansoni* genome in Wormbase-Parasite [32].

252

### 253 **Statistics**

254 All Statistical analyses were conducted using GraphPad Prism 7 software. To  
255 determine significant differences amongst population means, a Kruskal-Wallis ANOVA  
256 followed by Dunn's multiple comparisons test was used. *p* values are indicated as  
257 follows: \* <0.05, \*\* <0.01, \*\*\* <0.001.

## 258 **Results**

259 As part of our anti-infective research activities, a total of 14 synthetic compounds  
260 (including some intermediate analogues; S1 Table) were entered into a screening  
261 pipeline to identify active molecules (Fig. 1).

262

263 **Figure 1: The screening pipeline utilised in this anti-infective study.** A total of 14  
264 compounds were initially screened against *S. mansoni* schistosomula at a final  
265 concentration of 10  $\mu$ M. Hits were subsequently subjected to dose response titrations  
266 with the most active anti-schistosomula compound (Compound **1**) subsequently being  
267 used as a template for the preparation of further derivatives (compounds **2-9**).  
268 Compounds **2-9** were subsequently subjected to dose response titrations against  
269 schistosomula and adult worms. The most active compounds (original compound **1**  
270 and analogue **3**) were next titrated against juvenile worms. Finally, compounds **1, 3, 5**  
271 and **6** were additionally titrated against both Gram<sup>+</sup> (*S. aureus*) and Gram<sup>-</sup> (*E. coli*)  
272 bacterial exemplars.

273

274 These 14 compounds (S1 Table) were initially screened against the larval stage of *S.*  
275 *mansoni* (schistosomula) (S1 Figure). Amongst the collection, two compounds  
276 negatively affected both schistosomula motility and phenotype metrics at 10  $\mu$ M  
277 (Compound **1** and Compound **E** (S1a Figure)). Subsequent titration of these two  
278 compounds demonstrated that Compound **1** was more active (an average EC<sub>50</sub> of 4.7  
279  $\mu$ M for phenotype and motility) than Compound **E** (an average EC<sub>50</sub> of 5.6  $\mu$ M for  
280 phenotype and motility (S1b Figure)). Due to these initial anti-schistosomula screens  
281 identifying compound **1** as being moderately potent, a total of 8 analogues, all

282 containing a lactone ring core structure but differing in functional group modifications,  
283 were synthesised to further assess anti-schistosomal activities (S1 Table).

284

285 Firstly, in a direct comparison to compound **1**, each of the 8 analogues as well as  
286 compound **1** were titrated against the schistosomula stage to assess compound-  
287 induced changes to parasite motility and/or phenotype (Fig. 2).

288

289 **Figure 2: Anti-schistosomula activity of the eight analogues compared to parent**  
290 **compound 1.** A total of 120 mechanically transformed schistosomula were co-  
291 cultured with each compound, titrated at doses between 10 and 0.625  $\mu\text{M}$ . Test plates  
292 were incubated at 37°C for 72 hrs in an atmosphere containing 5%  $\text{CO}_2$ . At 72hrs,  
293 schistosomula were scored using the Roboworm platform for both motility (**A**) and  
294 phenotype (**B**). Any compound that induced a score of below -0.35 for motility (**A**) and  
295 -0.15 for phenotype (**B**) were considered a hit. Black squares indicate the most positive  
296 effect on motility or phenotype; grey scale from dark grey to lighter shades of grey  
297 indicates a progressive reduced compound efficacy; white squares indicate no effect  
298 on either phenotype or motility.  $Z'$  values for this screen was 0.41741 for motility and  
299 0.57275 for phenotype.

300

301 Out of the nine compounds titrated, four affected schistosomula motility (44.4%;  
302 compounds **1**, **3**, **4** and **5**) (Fig. 2A). Compounds **4** and **5** affected the motility of the  
303 parasites at both 10 and 5  $\mu\text{M}$ , whereas compound **1** and **3** affected the motility at all  
304 concentrations tested. When evaluating compound-mediated alterations of  
305 schistosomula phenotypes, five of the nine compounds had an effect (55.6%;  
306 compounds **1**, **3**, **4**, **5** and **7**) (Fig. 2B). Analogues **4**, **5** and **7** affected the phenotype

307 of the parasites at 10 and 5  $\mu$ M, compound **1** affected this metric from 10 to 1.25  $\mu$ M  
308 and compound **3** affected the phenotype of the schistosomula at all concentrations  
309 tested. Therefore, a substitution of the simple lactone ring (**1**) for a thiolactone ring (**3**)  
310 increased comparative anti-schistosomula potency at all concentrations tested. Of  
311 particular interest is the comparison of the two enantiomeric forms of Compound **1**.  
312 The (*R*)-enantiomer (**5**) affected schistosomula for both phenotype and motility at 10  
313  $\mu$ M and 5  $\mu$ M concentrations. However, no anti-schistosomula activity was observed  
314 for the (*S*)-enantiomer (**6**), suggesting that stereo-specificity of N-acyl homoserine is  
315 critical to structural activity relationships (SAR).

316

317 Due to initial indications that these analogues had varying activities against the  
318 schistosomula lifecycle stage (Table 2), the parent compound and its 8 analogues  
319 (Compounds **1-9**) were subsequently screened against 7-week old adult male and  
320 female worms (Fig. 3).



321 **Table 2: Calculated EC<sub>50</sub>, CC<sub>50</sub> and subsequent selectivity indices of N-acyl homoserines.**

| COMPOUND ID                | SCHISTOSOMULA EC <sub>50</sub> |                       | ADULT WORM EC <sub>50</sub> |                       | JUVENILE WORM    | HepG2                            |
|----------------------------|--------------------------------|-----------------------|-----------------------------|-----------------------|------------------|----------------------------------|
|                            | Phenotype                      | Motility              | Male                        | Female                | EC <sub>50</sub> | CC <sub>50</sub>                 |
| 1                          | 5.6<br>CI (4.9 - 6.2)          | 3.8<br>CI (2.4 - 5.2) | 8.2<br>CI (7.0 - 9.4)       | 8.3<br>CI **          | 4.3<br>CI **     | 43.5 323<br>CI (29.1 - 57.9)     |
| 2                          | >10<br>CI *                    | >10<br>CI *           | >20<br>CI *                 | >20<br>CI *           |                  | >200 324                         |
| 3                          | 2.3<br>CI (1.7 - 3.1)          | 1.9<br>CI (1.3 - 2.9) | 4.2<br>CI (3.9 - 4.6)       | 3.9<br>CI (3.4 - 4.5) | 0.5<br>CI **     | 18.7<br>CI (14.2 - 23.2)         |
| 4                          | 4.9<br>CI (4.5 - 5.2)          | 4.6<br>CI (4.1 - 5.0) | >10<br>CI **                | >10<br>CI **          |                  | 70.8 325<br>CI (57 - 84.8) 326   |
| 5                          | 4.0<br>CI **                   | 3.1<br>CI **          | >10<br>CI **                | >10<br>CI **          |                  | 50.6 327<br>CI (40.8 - 60.4) 328 |
| 6                          | >10<br>CI *                    | >10<br>CI *           | 16.0<br>CI (13.5 - 20.1)    | >20<br>CI *           |                  | >100 329<br>CI* 330              |
|                            |                                |                       |                             |                       |                  | 331                              |
| <b>SELECTIVITY INDICES</b> |                                |                       |                             |                       |                  |                                  |
| 1                          | 7.9                            | 11.5                  | 5.3                         | 5.2                   | 10.1             |                                  |
| 2                          |                                |                       |                             |                       |                  |                                  |
| 3                          | 8.1                            | 9.8                   | 4.5                         | 4.8                   | 37.4             |                                  |
| 4                          | 14.4                           | 15.4                  |                             |                       |                  |                                  |
| 5                          | 12.7                           | 16.3                  |                             |                       |                  |                                  |
| 6                          |                                |                       | 6.3                         |                       |                  |                                  |

345 Average EC<sub>50</sub> calculated for each compound and life cycle stage of the parasite. Values are expressed as μM concentrations and 95% confidence intervals  
346 are shown. For compound 4 and 5, adult male EC<sub>50</sub> is stated as >10 μM due to a rapid recovery in motility observed between 20 μM and 10 μM and,  
347 therefore, a more accurate estimate could not be obtained without further titration points between 20μM and 10μM.  
348 \* Confidence intervals were not calculated due to no compound effect seen at the highest dose tested  
349 \*\* Confidence intervals not calculable due to the motility scores obtained at the tested concentrations being too narrow (WHO-TDR scores of 3 and 4 only or 0  
350 and 4 only), and therefore an accurate 95% CI could not be calculated.

351 **Figure 3: Adult schistosome motility and egg production are differentially**  
352 **affected by the nine N-acyl homoserine lactones. A)** Adult *S. mansoni* worm pairs  
353 were cultured in decreasing compound concentrations of between 20  $\mu$ M and 1.25  $\mu$ M  
354 (not all concentrations were used for all compounds) for 72 hrs at 37°C, 5% CO<sub>2</sub>.  
355 Parasite motility was evaluated for each sex and scored using the WHO-TDR scoring  
356 system (0= Dead parasite, 4= Normal/Healthy movement). **B)** Culture media were  
357 collected from some adult co-cultures at 72 hrs and eggs present in the media were  
358 counted. *p* values are indicated as follows: \* <0.05, \*\* <0.01, \*\*\* <0.001.

359  
360 Initially, these screens were conducted at 20  $\mu$ M; any compounds that scored a 1 or 0  
361 for motility at this primary concentration were further titrated until no further effect was  
362 observed. For Compound **1**, an EC<sub>50</sub> for males was estimated to be 8.2  $\mu$ M and for  
363 females 8.3  $\mu$ M (Fig. 3A). Similar to the schistosomula assays, the differences  
364 observed in adult parasite motility when treated with the (*R*)- and (*S*)- enantiomers of  
365 Compound **1** were striking. The (*R*)-enantiomer (**5**) caused complete immobility at the  
366 highest dose of 20  $\mu$ M; conversely, the (*S*)-enantiomer (**6**) did not have this effect.  
367 Estimated EC<sub>50</sub>s for male and female parasites for these two enantiomers were  
368 determined (Table 2), with Compound **5** ((*R*)- enantiomer) having greater activity than  
369 Compound **6** ((*S*)- enantiomer).

370 While the propanamide analogue (**2**) had no activity against the adults, the  
371 thiolactone analogue (**3**) had good activity (similar to its effects on schistosomula) with  
372 significant reduction in motility observed down to 5  $\mu$ M; EC<sub>50</sub>s of 4.2  $\mu$ M for males and  
373 3.9  $\mu$ M for females were determined (Table 2). The thiolactone propanamide analogue  
374 (**4**) only demonstrated lethality at the highest concentration of 20  $\mu$ M with an EC<sub>50</sub> of

375 10.5  $\mu$ M and 18.4  $\mu$ M for males and females respectively (Table 2). No lethality/motility  
376 defects were observed for any of the chloro- analogues (Compounds **7**, **8** and **9**).

377 As morbidity associated with schistosomiasis is caused by egg-induced  
378 granuloma formation in tissues and the subsequent development of fibrotic lesions  
379 around these granulomas [33], compound-mediated modulation of *in vitro* egg  
380 production (as a surrogate for the *in vivo* pathology initiator) was next assessed (Fig.  
381 3B). Specifically, media derived from adult worm cultures incubated with compounds  
382 that resulted in complete immobility/lethality (compounds **1**, **3**, **4**, and **5**; compound **6**  
383 was also included as the (*S*)- stereoisomer of compound **1**) were collected and eggs  
384 counted (Fig. 3B). In comparison to the negative control DMSO, in which egg counts  
385 ranged from 300 – 594 (Average - 408), all N-Acyl homoserine lactones affected  
386 fecundity. The parent Compound (**1**) significantly affected egg laying down to 10  $\mu$ M  
387 ( $p < 0.0022$ ) when compared to DMSO. While both (*R*)-(compound **5**) and (*S*-  
388 (compound **6**) enantiomers reduced egg production, the (*R*)- enantiomer was more  
389 effective. Of the compounds evaluated, Compound **3** was, once again, the most  
390 potent. Here, fecundity was significantly reduced at concentrations down to 2.5  $\mu$ M ( $p$   
391 = 0.0413) when compared to DMSO controls. While egg production was still affected  
392 at 1.25  $\mu$ M, this was not statistically significant ( $p > 0.9999$ ).

393

394 Next, we further evaluated the most potent analogue (compound **3**) on 3-week old  
395 juvenile worms and compared its effect to that induced by the racemic parent  
396 compound (**1**) (Fig. 4).

397

398 **Figure 4: Three week juvenile worms are immobilised by N-Acyl homoserine**  
399 **lactones.** Three-week old juvenile *S. mansoni* worms (n= 13-33 per well) were co-

400 cultured with compounds (1) and (3) at concentrations spanning 15  $\mu$ M - 0.23  $\mu$ M for  
401 72 hrs at 37° C in a humidified atmosphere containing 5% CO<sub>2</sub>. Parasite motility was  
402 scored between 0 – 4 (0 = no movement/dead, 4 = full movement/healthy). DMSO  
403 negative controls were also included (1.25% final concentration) as well as two  
404 positive controls (15  $\mu$ M PZQ and 15  $\mu$ M auranofin; both in 1.25% DMSO). **A)** Effect  
405 of compound (1) on juvenile worm motility. **(B)** Effect of compound (3) on juvenile  
406 worm motility. *p* values are indicated as follows: \* <0.05, \*\* <0.01, \*\*\* <0.001.

407

408 For compound 1, an EC<sub>50</sub> of 4.3 $\mu$ M was noted with significant effect on worm motility  
409 down to 7.5  $\mu$ M (*p* = <0.0001) (Fig. 4A). For the thiolactone analogue (3), complete  
410 immobility was observed down to 0.94  $\mu$ M (*p* <0.0001 for all concentrations) and an  
411 EC<sub>50</sub> of 0.5  $\mu$ M determined (Fig 4B). This data is consistent with the findings observed  
412 in schistosomula and the 7-week adult worm screens where incorporation of a  
413 thiolactone resulted in more effective anti-schistosomal activity. To additionally  
414 demonstrate that these N-Acyl homoserine lactones led to juvenile worm death,  
415 propidium iodide was utilised in compound 1 and 3 co-cultures (Fig. 5).

416

417 **Figure 5: N-Acyl homoserine lactones kill juvenile stage schistosomes.** Three  
418 week juvenile schistosomes, incubated with compounds (1), (3) or controls for 72 hrs,  
419 were subsequently cultured with PI at a final concentration of 2  $\mu$ g/mL for 15 minutes  
420 at 37 °C in an environment containing 5% CO<sub>2</sub>. PI positive parasites (dead) were  
421 counted and the percent live vs dead in each well is indicated. **A)** Quantification of  
422 compound (1) mediated juvenile death. **B)** Quantification of compound (3) mediated  
423 juvenile death. **C)** Quantification of juvenile deaths in co-cultures containing 15  $\mu$ M  
424 PZQ (in 1.25% DMSO), 15  $\mu$ M auranofin (in 1.25% DMSO) and 1.25% DMSO.

425

426 The number of PI positive parasites when dosed with compound **1** was 100% at 15  
427 and 7.5  $\mu\text{M}$  concentrations, 13.3% at 3.75  $\mu\text{M}$  and 0% for all other concentrations (Fig.  
428 5A). In contrast, co-culture in compound **3** resulted in 100% of the parasites being PI  
429 positive down to 0.94  $\mu\text{M}$  (Fig. 5B); this result tightly aligns to the motility scores  
430 quantified by light microscopy (Fig. 4). Therefore, compounds **1** and **3** are not simply  
431 immobilising the juvenile parasites but are, in fact, killing them. To note, control  
432 juvenile parasites were also assessed for PI uptake (Fig. 5C). For DMSO treated  
433 parasites, as expected with high motility scores, 0% of the parasites scored PI positive.  
434 Interestingly, PZQ treated parasites also displayed similar results to that of DMSO  
435 treated parasites where 0% of the juvenile worms were PI positive. This is in  
436 contradiction to PZQ-treated parasites scoring the lowest (0-1) for motility (Fig. 4) and  
437 illustrates that, while this drug decreases motility, it does not kill juvenile stage  
438 parasites. Auranofin-treated parasites were all (100%) PI positive.

439 Evaluation of the indicative cytotoxic effect of these compounds against HepG2  
440 cells was subsequently tested. Compounds **1** - **6** were titrated (from 200 - 1  $\mu\text{M}$ ) on  
441 HepG2 cells and co-cultivated for 24 hrs. A previous large scale mammalian  
442 cytotoxicity study indicated that maximal HepG2 cytotoxicity was observed within the  
443 first 24 hrs for 91% of the active compounds [34]; therefore, 24 hrs continuous co-  
444 incubation of N-acyl homoserine lactones with HepG2 cells was selected for this study.  
445 The racemic compound (**1**) had an  $\text{EC}_{50}$  of 43.5  $\mu\text{M}$  (Table 2) on HepG2 cells.  
446 Evaluation of the individual enantiomers demonstrated that (*R*)- and (*S*)- enantiomers  
447 had higher  $\text{EC}_{50}$  concentrations compared to the parent compound **1** (50.6  $\mu\text{M}$  and  
448 >100  $\mu\text{M}$  respectively). Incorporation of the thiolactone (**3**) resulted in greater  
449 cytotoxicity ( $\text{EC}_{50}$  = 18.7 $\mu\text{M}$ ) with a 2.3 fold increase in comparison to compound **1**.

450 With the EC<sub>50</sub> data collected for schistosomula, adult and juvenile worms as  
451 well as the CC<sub>50</sub> for HepG2, the selectivity indices (SI) could be determined for each  
452 of the compounds tested (Table 2). For all lifecycle stages tested, the thiolactone  
453 analogue (**3**) had the lowest EC<sub>50</sub> values; however, it also had the poorest CC<sub>50</sub> values  
454 of all the compounds tested, which resulted in some of the lowest SI scores except for  
455 juvenile worms where a SI of 37.4 was noted.

456 Due to limited information regarding potential targets of compound **1**, we next  
457 conducted an evaluation of structural similarities to previously published compounds  
458 as a first step towards this goal (Fig. 6).

459

460 **Figure 6: *In silico* approach to identify potential targets of compound 1 within *S.***

461 ***mansoni*. A)** FragFP output in DataWarrior demonstrates that Compound **1** is  
462 structurally related to C4-HSL (formerly called PAI-2 [35]); C4-HSL is an N-acyl  
463 homoserines involved in quorum sensing within *P. aeruginosa*. Substitution of the  
464 methyl and bromine groups (found in compound **1**) is observed with propyl and  
465 stereochemistry modifications. **B)** Pathways in *P. aeruginosa* that utilise both C4- and  
466 C12- HSLs (LasI = acyl-homoserine-lactone synthase; LasR = transcriptional  
467 activator; RhIR = regulatory protein RhII = acyl-homoserine-lactone synthase).  
468 Highlighted (red rectangles) are those *P. aeruginosa* proteins used in BLASTp  
469 analysis of the *S. mansoni* genome (v 7.0).

470

471 Using LeadMine and Datawarrior tools [31], compound **1** was found to be structurally  
472 similar to that of the N-butanoyl-l-homoserine lactones C4-HSL and PAI-2 (Fig. 6A).  
473 Within *P. aeruginosa*, the N-3-oxo-dodecanoyl-l-homoserine lactone C12 and C4  
474 signal through LasR and RhIR to facilitate quorum sensing [36] (Fig. 6B). In addition

475 to this function, both C4 and C12 HSLs regulate gene expression within *P. aeruginosa*  
476 as well as within several mammalian host cells [37-39]. Subsequently, we evaluated  
477 whether compound **1** may target similar *S. mansoni* orthologues to those used by *P.*  
478 *aeruginosa* in facilitating C4-HSL and C12-HSL signal transduction events. Upon  
479 BLATSP analyses of the *S. mansoni* genome, our findings failed to provide convincing  
480 evidence for LasR, LasI, RhIR, RHII (*P. aeruginosa*) orthologues (data not shown).  
481 This suggests that our N-acyl homoserine analogue (**1**) is operating through differing  
482 mechanisms to that seen within bacteria, as has been postulated for mammalian  
483 systems [38, 39].

484

485 As Compound **1** was structurally similar to N-acyl homoserine lactones, a compound  
486 class involved in bacterial quorum sensing, we decided to assess its antimicrobial  
487 activity and determine if enantiomer separation or lactone ring substitution would  
488 change this activity. Compounds **1**, **3**, **5** and **6** were thus screened against  
489 representative Gram<sup>+</sup> (*Staphylococcus aureus*) and Gram<sup>-</sup> (*Escherichia coli*) species  
490 at final concentrations of 125, 62.5, 31.25, 15.6, 7.8 and 3.9 mg/L. Minimum inhibitory  
491 concentrations (MIC) were determined and represent the minimum concentration  
492 associated with no visible bacterial growth. The racemic compound (**1**) showed a MIC  
493 of 125 mg/L for both bacteria species, which was a similar value to that obtained for  
494 the (*R*)-enantiomer (**5**). In contrast, the (*S*)-enantiomer (**6**) did not show any activity (>  
495 125 mg/L) on either bacterial species indicating that, similarly to the anthelmintic  
496 activity, the (*R*)-enantiomer alone is responsible for the antimicrobial activity (Table 3).  
497 When the lactone ring was replaced with a thiolactone substituent (**3**), the activity was  
498 considerably improved leading to a MIC of 31.25 mg/L for *S. aureus* (IC<sub>50</sub> = 25.9 mg/L)  
499 and 62.5 mg/L for *E. coli* (IC<sub>50</sub> = 52.7 mg/L) (Table 3).

500 **Table 3. Antibacterial activity (MIC) of the tested compounds and antibacterial selectivity of**  
 501 **compound 3 (IC<sub>50</sub>)**

502

| Compound ID | <i>S. aureus</i>             | <i>E. coli</i>               | <i>S. aureus</i>                | <i>E. coli</i>                  | CC <sub>50</sub><br>(μM)<br>(HepG2) | Selectivity Index<br><i>S. aureus</i> /<br><i>E. coli</i> |
|-------------|------------------------------|------------------------------|---------------------------------|---------------------------------|-------------------------------------|-----------------------------------------------------------|
|             | MIC                          |                              | IC <sub>50</sub> (μM)           |                                 |                                     |                                                           |
| <b>1</b>    | <b>125</b><br>[563.1]        | <b>125</b><br>[563.1]        |                                 |                                 |                                     |                                                           |
| <b>3</b>    | <b>31.3</b><br>[131.2]       | <b>62.5</b><br>[262.5]       | <b>25.9</b><br>(23.3 -<br>30.7) | <b>52.7</b><br>(42.3 –<br>66.9) | <b>18.7</b><br>(14.2 -<br>23.2)     | 0.72 / 0.35                                               |
| <b>5</b>    | <b>125</b><br>[563.1]        | <b>125</b><br>[563.1]        |                                 |                                 |                                     |                                                           |
| <b>6</b>    | <b>&gt; 125</b><br>[> 563.1] | <b>&gt; 125</b><br>[> 563.1] |                                 |                                 |                                     |                                                           |

503

504 Minimum inhibitory concentration of compounds expressed as mg/L [μM] against *Staphylococcus*  
 505 *aureus* and *Escherichia coli*. IC<sub>50</sub> against *S. aureus* and *E. coli* determined from three independent  
 506 experiments and expressed as mg/L [μM] with 95% confidence interval (in parentheses). Selectivity  
 507 indices were calculated from HepG2 CC<sub>50</sub> values.



## 508 Discussion

509

510 The drive to identify new anti-infectives is of paramount importance due to the  
511 continuous documentation and threat of drug resistant pathogens [40-43]. In particular,  
512 our research group has focused on identifying new chemotherapeutic compounds  
513 active against *S. mansoni*, one of three major species responsible for human  
514 schistosomiasis.

515

516 In this study, 14 compounds were initially screened against schistosome parasites. It  
517 was evident that compound (**1**) had good activity against a range of lifecycle stages  
518 (schistosomula, adult and juvenile worms); therefore, a further 8 analogues (including  
519 the separated enantiomers) were generated. Interestingly the (*R*)-enantiomer was  
520 more effective when compared to the (*S*)-enantiomer in all of the parasitic assays  
521 conducted in this study; the (*R*)-enantiomer alone was also less toxic than parent  
522 compound **1** (EC<sub>50</sub> 50.6μM and 43.5μM respectively). It is not surprising that different  
523 activities are associated with enantiomers; indeed PZQ itself is only effective via its  
524 (*R*)- enantiomer [44]. For example, Patterson *et al* demonstrated that the (*R*)-  
525 enantiomer of PA-824 (a promising antitubercular drug) had greater activity (when  
526 compared to the (*S*) enantiomer) against *L. donovani* during *in vivo* studies [45].  
527 Furthermore, Paredes *et al* demonstrated that (*R*)-albendazole sulfoxide had greater  
528 anthelmintic activity against *T. solium* when compared to (*S*)-albendazole [46]. Our  
529 data, along with these and other parasitic studies [47], provides clear evidence that  
530 compound chirality represents an important consideration for drug discovery  
531 progression and putative target identification.

532

533 Upon further exploration of structural activity relationships, we found that elongation  
534 of the N-acyl chain led to decreased activity (**1** vs **2**; **3** vs **4**), while substitution of the  
535 lactone ring with a thiolactone improved activity (**1** vs **3**, **2** vs **4**) and led to the most  
536 active compound **3**. It is reasonable to speculate that should **3** be available as the pure  
537 (*R*)-enantiomer, improvements in both anti-schistosomal potency and host cell  
538 cytotoxicity would be found (similar to those observed for compound **1** versus  
539 enantiomer pure (*R*) - **5** and (*S*) - **6**). A reduction in schistosome fecundity was noted  
540 in cultures co-incubated with **3** vs **4**; therefore, it could be argued that the addition of  
541 the methyl group in position 2 to the thiolactone analogue reduces parasite fecundity.

542

543 Comparative structural analysis revealed that compound **1**, having been previously  
544 characterised as an intermediary product of one-step procedures for producing Gram<sup>-</sup>  
545 N-acyl homoserines [48, 49], was similar to that of quorum sensing N-acyl  
546 homoserines. In recent years, quorum sensing has become a focus of development  
547 as a target for new anti-infective treatments [50]. Quorum sensing is a method by  
548 which both eukaryotic and prokaryotic cells regulate gene expression in response to  
549 fluctuations in cell population densities. Of relevance to parasites, *Trypanosoma*  
550 *brucei* is known to regulate its surrounding population by an analogous quorum  
551 sensing mechanism. In order to evade the host immunity response, trypanosomes  
552 adopt a slender morphology to proliferate, and in order to enter their transmission  
553 stage will transform into a stumpy form in which they stop proliferating [51]. This  
554 differentiation between two morphologically and molecular lifecycle stages is  
555 dependent on parasite density, and therefore can be seen as a type of quorum sensing  
556 [52, 53]. Much work has gone into identifying the mechanisms responsible for this  
557 density sensing to provide potential quorum sensing drug targets in trypanosomes

558 [53]. Quorum sensing in schistosomes (or other metazoan endoparasites), to regulate  
559 lifecycle transitions, has not yet been identified.

560

561 With the identification of our parent compound having structural similarities to that of  
562 quorum-sensing N-acyl homoserines, we decided to evaluate compounds **1** and **3** (the  
563 most effective compound against *S. mansoni*), as well as the (*R*)- and (*S*)-  
564 enantiomers (**5** and **6** respectively) against both Gram<sup>+</sup> and Gram<sup>-</sup> bacteria to assess  
565 their potential as antimicrobials. Our findings in the bacteria screens were consistent  
566 with the *S. mansoni* data in that **3** was the most potent N-acyl homoserine against  
567 Gram<sup>+</sup> bacteria and that the (*R*)- (**5**) was more effective than the (*S*)- (**6**) enantiomer.  
568 Furthermore, the thiolactone (**3**) had a 4- and 2- fold improvement in activity against  
569 *S. aureus* and *E. coli* respectively, compared to compound **1**. It is interesting that N-  
570 acyl homoserines should have greater effect against a Gram<sup>+</sup> bacteria, which in  
571 natural environments do not utilise these compounds as part of their quorum sensing  
572 regulation [54]. An explanation for increased inhibition of *S. aureus* growth when  
573 treated with compound **3** may be due to cross-inhibition between bacteria species. It  
574 has previously been demonstrated that bacteria undergo strategies to reduce the  
575 efficacy of quorum sensing used by competitor bacterial species and thus increase the  
576 likelihood of their own survival [54, 55]. The role of N-acyl homoserines in this process  
577 of cell to cell bacterial communication has been clearly demonstrated for *S. aureus*  
578 and *P. aeruginosa* [56]. Here, N-acyl homoserines (e.g. 3-oxo-C<sub>12</sub>-HSL) produced by  
579 Gram<sup>-</sup> *P. aeruginosa* inhibit growth and virulence factor production of Gram<sup>+</sup> *S. aureus*.  
580 When co-inhabiting infected tissues, this N-acyl homoserine-mediated strategy of cell  
581 communication provides *P. aeruginosa* with a competitive advantage over *S. aureus*.  
582 Other studies have also demonstrated a role for N-acyl homoserines in mediating

583 pathogen population densities; for example, *Candida albicans* filamentation can be  
584 suppressed by 3-oxo-C<sub>12</sub>-HSL (homoserine lactone) produced by *P. aeruginosa* [57].  
585 It is, therefore, likely that our synthetic N-acyl homoserine analogues (especially  
586 thiolactone containing compound **3**) inhibit *S. aureus* growth in a similar manner as  
587 the above examples or those additional ones found in the literature illustrate (54, 55).  
588 For example, McInnis *et al* have previously designed and validated a library of 21  
589 thiolactone analogues that were either naturally occurring or non-native N-acyl  
590 homoserines and evaluated their effect as agonists and antagonists of LuxR-type  
591 quorum sensing receptors in *P.aeruginosa* (LasR), *V. fischeri* (LuxR), and  
592 *A.tumefaciens* (TraR). They were able to demonstrate the improved potency of the  
593 thiolactone analogues in comparison to the N-acyl homoserine parent compound  
594 (similar to our findings here) [58].

595  
596 In *P. aeruginosa*, its N-acyl homoserines primarily function through the transcription  
597 factors LasR and RhIR, but similar orthologues were not identified in the *S. mansoni*  
598 genome. However, it has also been shown that bacterial N-acyl homoserines mediate  
599 cross-Kingdom communication by directly interacting with membrane lipids; this  
600 mechanism of action may be responsible for the anti-schistosomal effects observed in  
601 our studies (although detailed microscopy studies would need to confirm this  
602 hypothesis). For example, long chain N-acyl homoserines (e.g. 3-oxo-C<sub>12</sub>-HSL) can  
603 insert into cholesterol-containing microdomains leading to changes in dipole potential,  
604 integral protein re-organisation and subsequent activation of signal transduction  
605 cascades [37, 59]. The intra-mammalian schistosome is covered by two tightly  
606 opposed lipid bilayers including an inner plasma membrane and an outer  
607 membranocalyx [60-62]. The membranocalyx has the highest density of

608 intramembranous particles [63] comprised of nutrient transporters, transmembrane  
609 proteins and other gene products of currently unknown function [64-66]. Also, it is rich  
610 in neutral lipids, cholesterol and phospholipids [67-70]. It is possible that the  
611 compounds analysed in this study may bind to the cholesterol rich regions within this  
612 membranocalyx layer, which subsequently causes conformational changes to the  
613 transmembrane proteins affecting their downstream signalling cascades. This could  
614 ultimately result in the phenotypes observed in our studies.

615

616 To the best of our knowledge, this is the first study to demonstrate that synthetic  
617 bacterial N-acyl homoserines analogues are active against *S. mansoni*. This is a new  
618 avenue of investigation as these compounds represent novel starting points for future  
619 anthelmintic drug discovery studies. We have also demonstrated the importance of  
620 enantiomer contribution, in line with previous findings, and that some molecules  
621 display cross-pathogen activity. When taken together, these findings could inform the  
622 development of new, broad-acting anti-infectives.

623 **Acknowledgments**

624

625 We thank Ms Julie Hirst and all of Prof. Karl F. Hoffmann's laboratory for help in  
626 maintaining the *S. mansoni* life cycle. We also thank Prof. Luis Muir, Aberystwyth  
627 University, for the use of his laboratory for conducting the bacterial screens. We also  
628 thank Noel O'Boyle (NextMove Software Ltd.) for kindly running LeadMine on PubMed  
629 abstracts for this study. For the mass spectrometry data, we would like to thank the  
630 EPSRC National Mass Spectrometry Service Centre in Swansea.

631

632 **Supporting Information**

633

634 **S1 Protocol: Detailed materials and methods for chemical synthesis of**  
635 **compounds 1 – 9.**

636

637 **S1 Table: Structural details of all compounds screened against *S. mansoni* in**  
638 **this study.** The first 14 compounds represent the initial compounds screened. The  
639 following 8 are compound 1 analogues.

640

641 **S1 Figure: Initial schistosomula screens of the 14 compounds and their**  
642 **intermediate analogues.** A total of 120 mechanically transformed schistosomula  
643 were co-cultured with each compound, titrated at doses between 10 and 0.625  $\mu\text{M}$ .  
644 Test plates were incubated at 37°C for 72 hrs in an atmosphere containing 5%  $\text{CO}_2$ .  
645 At 72hrs, schistosomula were scored using the Roboworm platform for both motility  
646 and phenotype as previously described [17, 25]. **A)** Of the 14 compounds evaluated,  
647 two fell within the hit region. Z' scores for motility and phenotype were 0.40079 and

648 0.56846 respectively. **B)** Further titration of the two hit compounds resulted in good  
649 compound effect being observed for compound **1** down to a concentration of 1.25  $\mu$ M.  
650 Z' scores for motility and phenotype were 0.37864 and 0.47882 respectively. \*Average  
651 EC<sub>50</sub> value across motility and phenotype is presented for each compound.

652 **References**

653

- 654 1. Organization WH. Working to overcome the global impact of neglected  
655 tropical diseases: first WHO report on neglected tropical diseases. Geneva: World  
656 Health Organization; 2010.
- 657 2. Hotez PJ, Alvarado M, Basáñez M-G, Bolliger I, Bourne R, Boussinesq M, et  
658 al. The global burden of disease study 2010: interpretation and implications for the  
659 neglected tropical diseases. *PLoS neglected tropical diseases*. 2014;8(7):e2865.
- 660 3. Frieri M, Kumar K, Boutin A. Antibiotic resistance. *Journal of infection and  
661 public health*. 2017;10(4):369-78.
- 662 4. Morschhäuser J. Regulation of multidrug resistance in pathogenic fungi.  
663 *Fungal Genetics and Biology*. 2010;47(2):94-106.
- 664 5. Chevalier FD, Le Clerc'h W, McDew-White M, Menon V, Guzman MA,  
665 Holloway SP, et al. Oxamniquine resistance alleles are widespread in Old World  
666 *Schistosoma mansoni* and predate drug deployment. *PLoS pathogens*. 2019;15(10).
- 667 6. Patrick J, Anderson F, Wilson K, McCormick I, Skuce P, O'Roarke J.  
668 Triclabendazole-resistant liver fluke: issues and strategies. *Livestock*.  
669 2018;23(Sup5):4-14.
- 670 7. Noedl H, Se Y, Schaecher K, Smith BL, Socheat D, Fukuda MM. Evidence of  
671 artemisinin-resistant malaria in western Cambodia. *New England Journal of  
672 Medicine*. 2008;359(24):2619-20.
- 673 8. Lira R, Sundar S, Makharia A, Kenney R, Gam A, Saraiva E, et al. Evidence  
674 that the high incidence of treatment failures in Indian kala-azar is due to the  
675 emergence of antimony-resistant strains of *Leishmania donovani*. *The Journal of  
676 infectious diseases*. 1999;180(2):564-7.
- 677 9. Shlaes DM, Projan SJ, Edwards J. Antibiotic discovery: state of the state.  
678 *ASM News-American Society for Microbiology*. 2004;70(6):275-81.
- 679 10. Bush K. Why it is important to continue antibacterial drug discovery. *ASM  
680 News-American Society for Microbiology*. 2004;70(6):282-7.
- 681 11. Projan SJ. Why is big Pharma getting out of antibacterial drug discovery?  
682 *Current opinion in microbiology*. 2003;6(5):427-30.
- 683 12. El Ridi RA, Tallima HA-M. Novel therapeutic and prevention approaches for  
684 schistosomiasis. *Journal of Advanced Research*. 2013;4(5):467-78.
- 685 13. Colley D, Secor W. Immunology of human schistosomiasis. *Parasite  
686 immunology*. 2014;36(8):347-57.



- 687 14. Vale N, Gouveia MJ, Rinaldi G, Brindley PJ, Gärtner F, da Costa JMC.  
688 Praziquantel for schistosomiasis: single-drug metabolism revisited, mode of action,  
689 and resistance. *Antimicrobial agents and chemotherapy*. 2017;61(5):e02582-16.
- 690 15. Cioli D, Pica-Mattoccia L, Basso A, Guidi A. Schistosomiasis control:  
691 praziquantel forever? *Molecular and biochemical parasitology*. 2014;195(1):23-9.
- 692 16. Edwards J, Brown M, Peak E, Bartholomew B, Nash RJ, Hoffmann KF. The  
693 diterpenoid 7-keto-sempervirol, derived from *Lycium chinense*, displays anthelmintic  
694 activity against both *Schistosoma mansoni* and *Fasciola hepatica*. *PLoS neglected*  
695 *tropical diseases*. 2015;9(3):e0003604.
- 696 17. Crusco A, Bordoni C, Chakroborty A, Whatley KC, Whiteland H, Westwell AD,  
697 et al. Design, synthesis and anthelmintic activity of 7-keto-sempervirol analogues.  
698 *European journal of medicinal chemistry*. 2018;152:87-100.
- 699 18. Whiteland HL, Chakroborty A, Forde-Thomas JE, Crusco A, Cookson A,  
700 Hollinshead J, et al. An *Abies procera*-derived tetracyclic triterpene containing a  
701 steroid-like nucleus core and a lactone side chain attenuates in vitro survival of both  
702 *Fasciola hepatica* and *Schistosoma mansoni*. *International Journal for Parasitology:*  
703 *Drugs and Drug Resistance*. 2018;8(3):465-74.
- 704 19. Whatley K, Padalino G, Whiteland H, Geyer K, Hulme B, Chalmers I, et al.  
705 The repositioning of epigenetic probes/inhibitors identifies new anti-schistosomal  
706 lead compounds and chemotherapeutic targets. *BioRxiv*. 2019:729814.
- 707 20. Padalino G, Ferla S, Brancale A, Chalmers IW, Hoffmann KF. Combining  
708 bioinformatics, cheminformatics, functional genomics and whole organism  
709 approaches for identifying epigenetic drug targets in *Schistosoma mansoni*.  
710 *International Journal for Parasitology: Drugs and Drug Resistance*. 2018;8(3):559-  
711 70.
- 712 21. Crusco A, Baptista R, Bhowmick S, Beckmann M, Mur LA, Westwell AD, et al.  
713 The anti-mycobacterial activity of a diterpenoid-like molecule operates through  
714 nitrogen and amino acid starvation. *Frontiers in Microbiology*. 2019;10:1444.
- 715 22. Williams P. Quorum sensing, communication and cross-kingdom signalling in  
716 the bacterial world. *Microbiology*. 2007;153(12):3923-38.
- 717 23. Bickle Q, Doenhoff M. Comparison of the live vaccine potential of different  
718 geographic isolates of *Schistosoma mansoni*. *Journal of helminthology*.  
719 1987;61(3):191-5.
- 720 24. Colley DG, Wikel SK. *Schistosoma mansoni*: simplified method for the  
721 production of schistosomules. *Exp Parasitol*. 1974;35(1):44-51.
- 722 25. Crusco A, Bordoni C, Chakroborty A, Whatley KCL, Whiteland H, Westwell  
723 AD, et al. Design, synthesis and anthelmintic activity of 7-keto-sempervirol  
724 analogues. *Eur J Med Chem*. 2018;152:87-100.

- 725 26. Ramirez B, Bickle Q, Yousif F, Fakorede F, Mouries MA, Nwaka S.  
726 Schistosomes: challenges in compound screening. *Expert Opin Drug Discov.*  
727 2007;2(s1):S53-61.
- 728 27. Peak E, Chalmers IW, Hoffmann KF. Development and validation of a  
729 quantitative, high-throughput, fluorescent-based bioassay to detect schistosoma  
730 viability. *PLoS neglected tropical diseases.* 2010;4(7):e759.
- 731 28. Nur EAM, Yousaf M, Ahmed S, Al-Sheddi ES, Parveen I, Fazakerley DM, et  
732 al. Neoclerodane Diterpenoids from Reehal Fatima, *Teucrium yemense*. *J Nat Prod.*  
733 2017;80(6):1900-8.
- 734 29. Microbiology ECfASTotESoC, Diseases I. Determination of minimum  
735 inhibitory concentrations (MICs) of antibacterial agents by broth dilution. *Clinical*  
736 *Microbiology and Infection.* 2003;9(8):ix-xv.
- 737 30. Lowe DM, Sayle RA. LeadMine: a grammar and dictionary driven approach to  
738 entity recognition. *Journal of cheminformatics.* 2015;7(1):S5.
- 739 31. Sander T, Freyss J, von Korff M, Rufener C. DataWarrior: an open-source  
740 program for chemistry aware data visualization and analysis. *Journal of chemical*  
741 *information and modeling.* 2015;55(2):460-73.
- 742 32. Howe KL, Bolt BJ, Cain S, Chan J, Chen WJ, Davis P, et al. WormBase 2016:  
743 expanding to enable helminth genomic research. *Nucleic acids research.*  
744 2016;44(D1):D774-D80.
- 745 33. Gray DJ, Ross AG, Li Y-S, McManus DP. Diagnosis and management of  
746 schistosomiasis. *Bmj.* 2011;342:d2651.
- 747 34. Hsieh J-H, Huang R, Lin J-A, Sedykh A, Zhao J, Tice RR, et al. Real-time cell  
748 toxicity profiling of Tox21 10K compounds reveals cytotoxicity dependent toxicity  
749 pathway linkage. *PloS one.* 2017;12(5):e0177902.
- 750 35. Pearson JP, Van Delden C, Iglewski BH. Active efflux and diffusion are  
751 involved in transport of *Pseudomonas aeruginosa* cell-to-cell signals. *Journal of*  
752 *bacteriology.* 1999;181(4):1203-10.
- 753 36. Pesci EC, Pearson JP, Seed PC, Iglewski BH. Regulation of las and rhl  
754 quorum sensing in *Pseudomonas aeruginosa*. *Journal of bacteriology.*  
755 1997;179(10):3127-32.
- 756 37. Davis BM, Jensen R, Williams P, O'Shea P. The interaction of N-  
757 acylhomoserine lactone quorum sensing signaling molecules with biological  
758 membranes: implications for inter-kingdom signaling. *PloS one.* 2010;5(10):e13522.
- 759 38. Kravchenko VV, Kaufmann GF, Mathison JC, Scott DA, Katz AZ, Wood MR,  
760 et al. N-(3-oxo-acyl) homoserine lactones signal cell activation through a mechanism  
761 distinct from the canonical pathogen-associated molecular pattern recognition  
762 receptor pathways. *Journal of Biological Chemistry.* 2006;281(39):28822-30.

- 763 39. Hooi DS, Bycroft BW, Chhabra SR, Williams P, Pritchard DI. Differential  
764 immune modulatory activity of *Pseudomonas aeruginosa* quorum-sensing signal  
765 molecules. *Infection and immunity*. 2004;72(11):6463-70.
- 766 40. Tacconelli E, Carrara E, Savoldi A, Harbarth S, Mendelson M, Monnet DL, et  
767 al. Discovery, research, and development of new antibiotics: the WHO priority list of  
768 antibiotic-resistant bacteria and tuberculosis. *The Lancet Infectious Diseases*.  
769 2018;18(3):318-27.
- 770 41. Nikaido H. Multidrug resistance in bacteria. *Annual review of biochemistry*.  
771 2009;78:119-46.
- 772 42. Donia M, Hamann MT. Marine natural products and their potential  
773 applications as anti-infective agents. *The Lancet infectious diseases*. 2003;3(6):338-  
774 48.
- 775 43. Doenhoff MJ, Kusel JR, Coles GC, Cioli D. Resistance of *Schistosoma*  
776 *mansoni* to praziquantel: is there a problem? *Transactions of the Royal Society of*  
777 *Tropical Medicine and Hygiene*. 2002;96(5):465-9.
- 778 44. Meister I, Ingram-Sieber K, Cowan N, Todd M, Robertson MN, Meli C, et al.  
779 Activity of praziquantel enantiomers and main metabolites against *Schistosoma*  
780 *mansoni*. *Antimicrobial agents and chemotherapy*. 2014;58(9):5466-72.
- 781 45. Patterson S, Wyllie S, Stojanovski L, Perry MR, Simeons FR, Norval S, et al.  
782 The R enantiomer of the antitubercular drug PA-824 as a potential oral treatment for  
783 visceral leishmaniasis. *Antimicrobial agents and chemotherapy*. 2013;57(10):4699-  
784 706.
- 785 46. Paredes A, de Campos Lourenço T, Marzal M, Rivera A, Dorny P, Mahanty S,  
786 et al. In vitro analysis of albendazole sulfoxide enantiomers shows that (+)-(R)-  
787 albendazole sulfoxide is the active enantiomer against *Taenia solium*. *Antimicrobial*  
788 *agents and chemotherapy*. 2013;57(2):944-9.
- 789 47. Nanayakkara ND, Ager AL, Bartlett MS, Yardley V, Croft SL, Khan IA, et al.  
790 Antiparasitic activities and toxicities of individual enantiomers of the 8-  
791 aminoquinoline 8-[(4-amino-1-methylbutyl) amino]-6-methoxy-4-methyl-5-[3, 4-  
792 dichlorophenoxy] quinoline succinate. *Antimicrobial agents and chemotherapy*.  
793 2008;52(6):2130-7.
- 794 48. Persson T, Hansen TH, Rasmussen TB, Skindersø ME, Givskov M, Nielsen J.  
795 Rational design and synthesis of new quorum-sensing inhibitors derived from  
796 acylated homoserine lactones and natural products from garlic. *Organic &*  
797 *biomolecular chemistry*. 2005;3(2):253-62.
- 798 49. Stacy DM, Le Qument ST, Hansen CL, Clausen JW, Tolker-Nielsen T,  
799 Brummond JW, et al. Synthesis and biological evaluation of triazole-containing N-  
800 acyl homoserine lactones as quorum sensing modulators. *Organic & biomolecular*  
801 *chemistry*. 2013;11(6):938-54.

- 802 50. Kaufmann GF, Park J, Janda KD. Bacterial quorum sensing: a new target for  
803 anti-infective immunotherapy. *Expert opinion on biological therapy*. 2008;8(6):719-  
804 24.
- 805 51. Vickerman K. Developmental cycles and biology of pathogenic trypanosomes.  
806 *British medical bulletin*. 1985;41(2):105-14.
- 807 52. Vassella E, Reuner B, Yutzy B, Boshart M. Differentiation of African  
808 trypanosomes is controlled by a density sensing mechanism which signals cell cycle  
809 arrest via the cAMP pathway. *Journal of cell science*. 1997;110(21):2661-71.
- 810 53. Mony BM, MacGregor P, Ivens A, Rojas F, Cowton A, Young J, et al.  
811 Genome-wide dissection of the quorum sensing signalling pathway in *Trypanosoma*  
812 *brucei*. *Nature*. 2014;505(7485):681.
- 813 54. Bassler BL. Small talk: cell-to-cell communication in bacteria. *Cell*.  
814 2002;109(4):421-4.
- 815 55. Taga ME, Bassler BL. Chemical communication among bacteria. *Proceedings*  
816 *of the National Academy of Sciences*. 2003;100(suppl 2):14549-54.
- 817 56. Qazi S, Middleton B, Muharram SH, Cockayne A, Hill P, O'Shea P, et al. N-  
818 acylhomoserine lactones antagonize virulence gene expression and quorum sensing  
819 in *Staphylococcus aureus*. *Infection and immunity*. 2006;74(2):910-9.
- 820 57. Hogan DA, Vik Å, Kolter R. A *Pseudomonas aeruginosa* quorum-sensing  
821 molecule influences *Candida albicans* morphology. *Molecular microbiology*.  
822 2004;54(5):1212-23.
- 823 58. McInnis CE, Blackwell HE. Thiolactone modulators of quorum sensing  
824 revealed through library design and screening. *Bioorganic & medicinal chemistry*.  
825 2011;19(16):4820-8.
- 826 59. Song D, Meng J, Cheng J, Fan Z, Chen P, Ruan H, et al. *Pseudomonas*  
827 *aeruginosa* quorum-sensing metabolite induces host immune cell death through cell  
828 surface lipid domain dissolution. *Nature microbiology*. 2019;4(1):97-111.
- 829 60. Hockley DJ, McLaren DJ. *Schistosoma mansoni*: changes in the outer  
830 membrane of the tegument during development from cercaria to adult worm.  
831 *International journal for parasitology*. 1973;3(1):13-20.
- 832 61. McLaren DJ, HOCKLEY DJ. Blood flukes have a double outer membrane.  
833 *Nature*. 1977;269(5624):147-9.
- 834 62. Skelly PJ, Wilson RA. Making sense of the schistosome surface. *Advances in*  
835 *parasitology*. 2006;63:185-284.
- 836 63. Hockley D, McLaren DJ, Ward BJ, Nermut M. A freeze-fracture study of the  
837 tegumental membrane of *Schistosoma mansoni* (Platyhelminthes: Trematoda).  
838 *Tissue and Cell*. 1975;7(3):485-96.

- 839 64. van Balkom BW, van Gestel RA, Brouwers JF, Krijgsveld J, Tielens AG, Heck  
840 AJ, et al. Mass Spectrometric Analysis of the *Schistosoma mansoni* Tegumental  
841 Sub-proteome. *Journal of proteome research*. 2005;4(3):958-66.
- 842 65. Braschi S, Borges WC, Wilson RA. Proteomic analysis of the schistosome  
843 tegument and its surface membranes. *Memorias do Instituto Oswaldo Cruz*.  
844 2006;101:205-12.
- 845 66. Castro-Borges W, Simpson DM, Dowle A, Curwen RS, Thomas-Oates J,  
846 Beynon RJ, et al. Abundance of tegument surface proteins in the human blood fluke  
847 *Schistosoma mansoni* determined by QconCAT proteomics. *Journal of Proteomics*.  
848 2011;74(9):1519-33.
- 849 67. Retra K, deWalick S, Schmitz M, Yazdanbakhsh M, Tielens AG, Brouwers JF,  
850 et al. The tegumental surface membranes of *Schistosoma mansoni* are enriched in  
851 parasite-specific phospholipid species. *International journal for parasitology*.  
852 2015;45(9-10):629-36.
- 853 68. Tallima H, Hamada M, El Ridi R. Evaluation of cholesterol content and impact  
854 on antigen exposure in the outer lipid bilayer of adult schistosomes. *Parasitology*.  
855 2007;134(12):1775-83.
- 856 69. Rogers MV, McLaren DJ. Analysis of total and surface membrane lipids of  
857 *Schistosoma mansoni*. *Molecular and biochemical parasitology*. 1987;22(2-3):273-  
858 88.
- 859 70. Migliardo F, Tallima H, El Ridi R. Is There a Sphingomyelin-Based Hydrogen  
860 Bond Barrier at the Mammalian Host–Schistosome Parasite Interface? *Cell*  
861 *biochemistry and biophysics*. 2014;68(2):359-67.
- 862

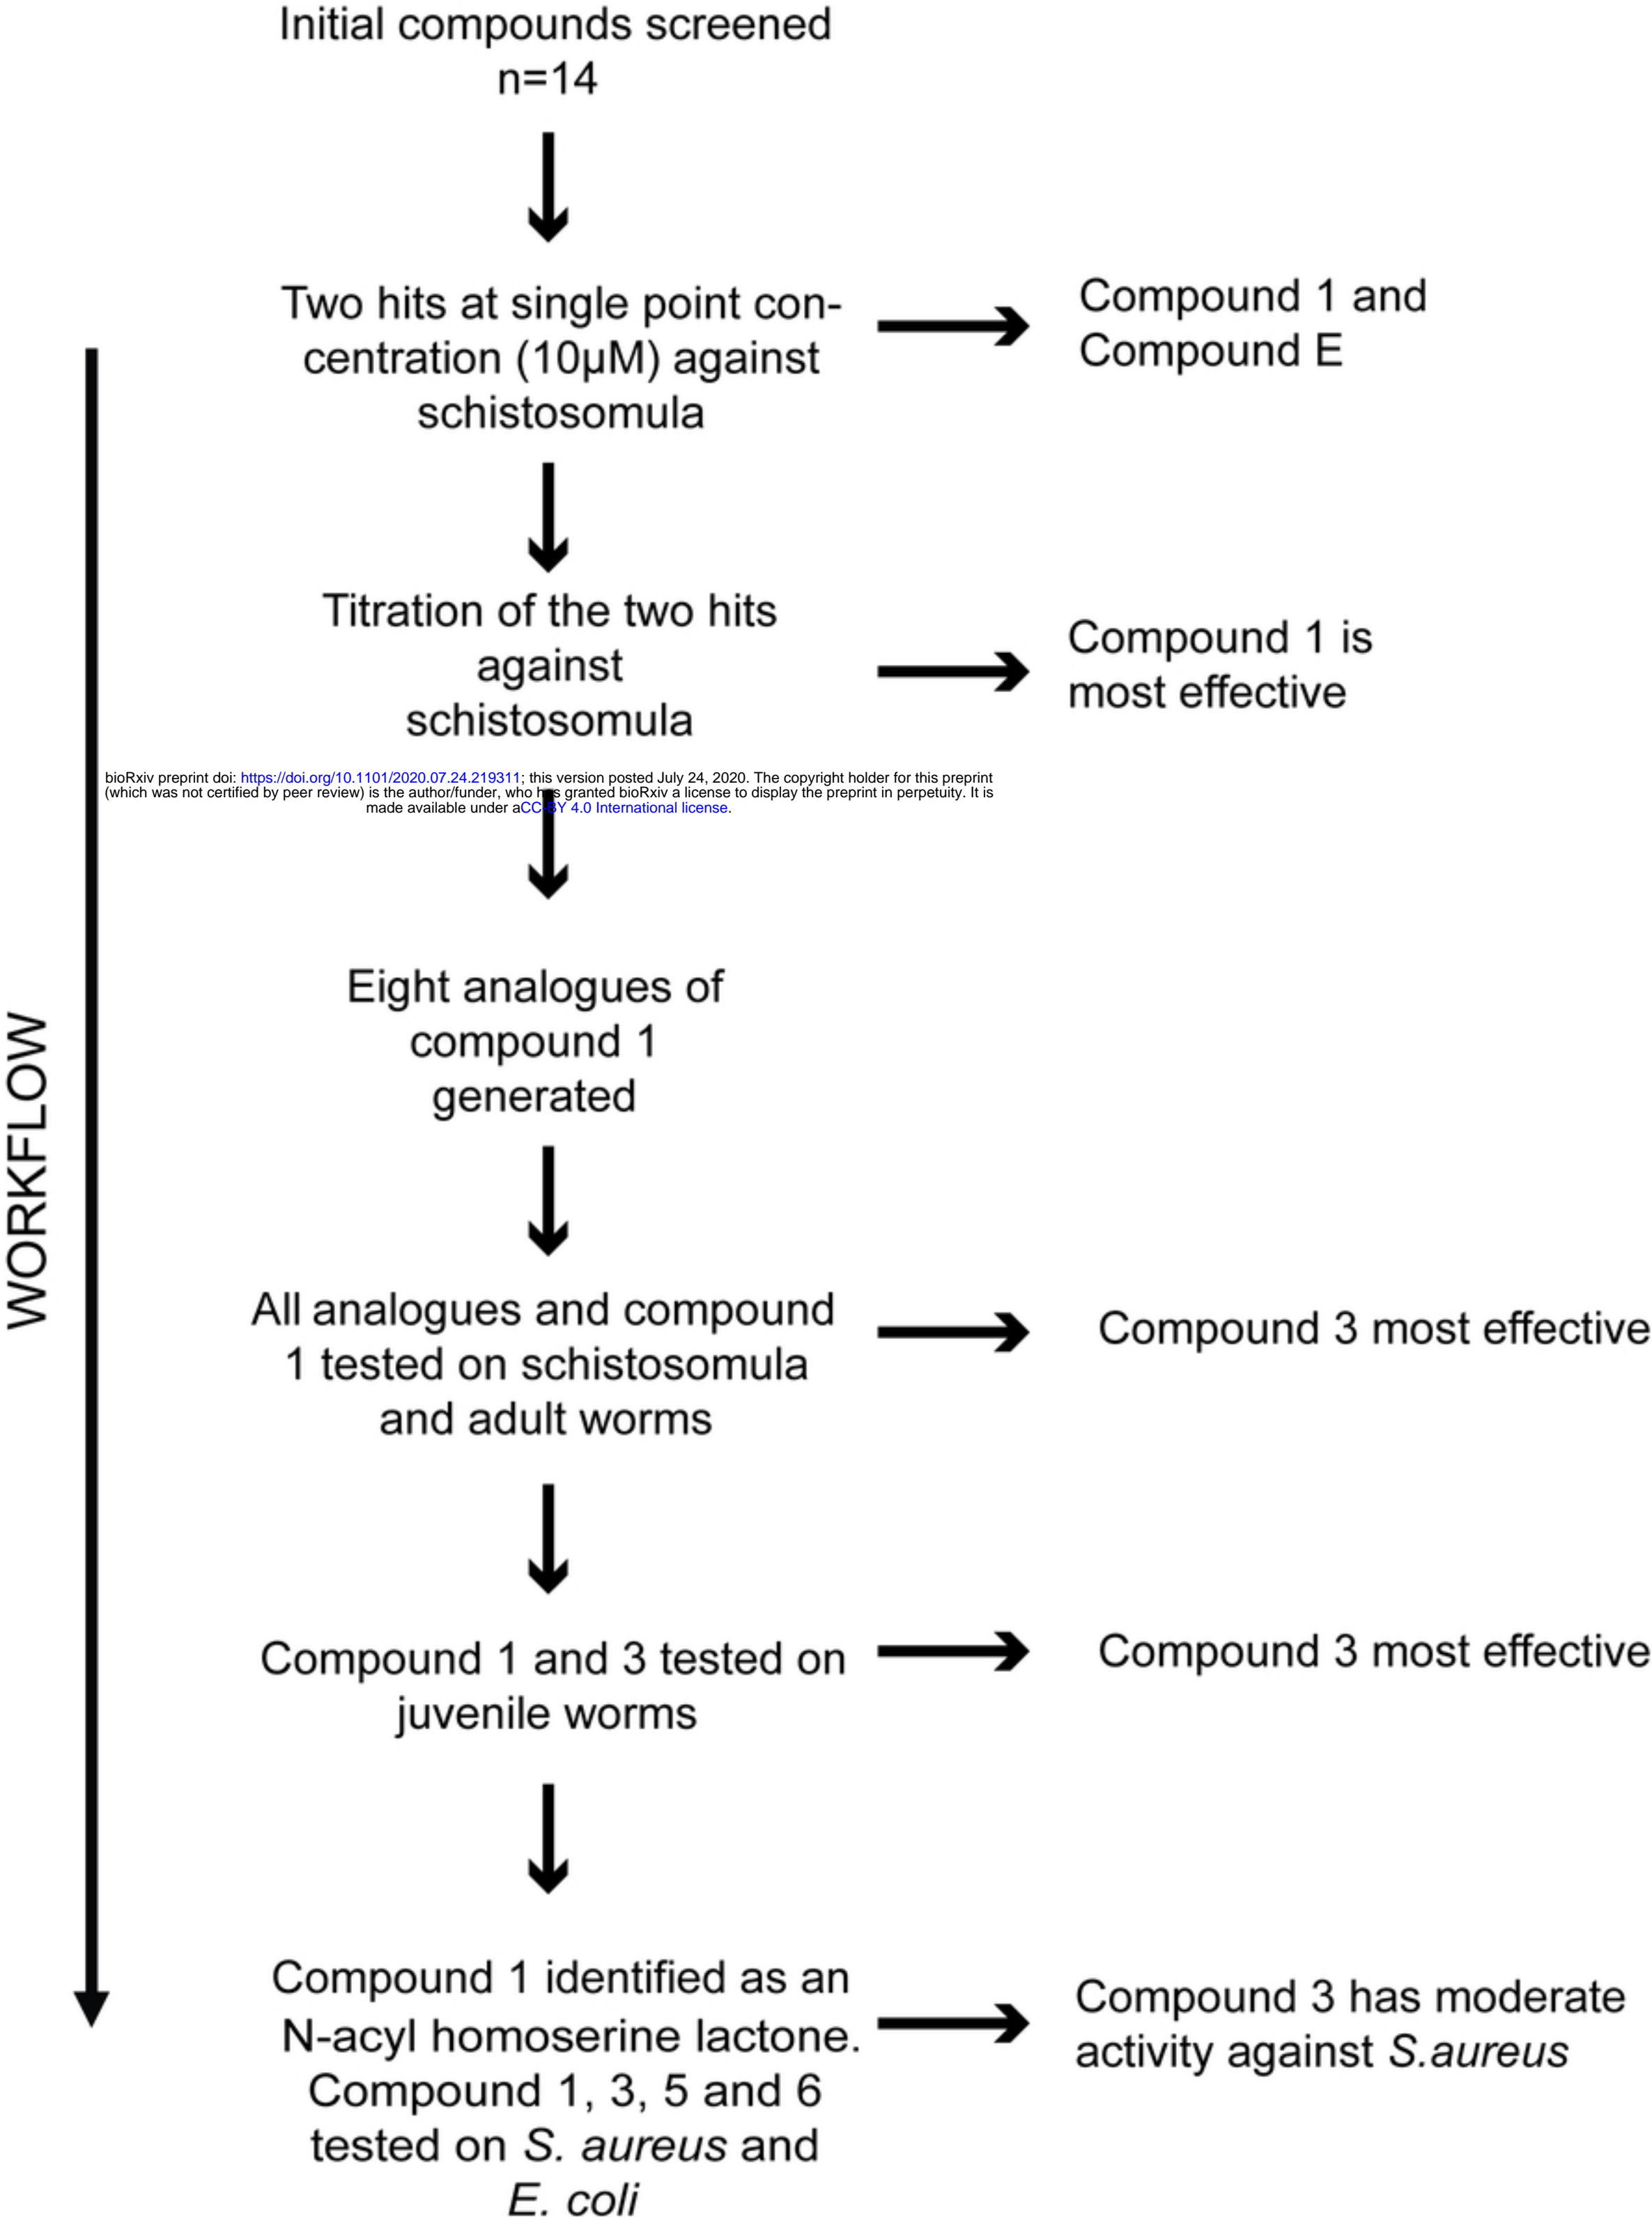

Figure 1

**A**

### Schistosomula Motility Titration Scores

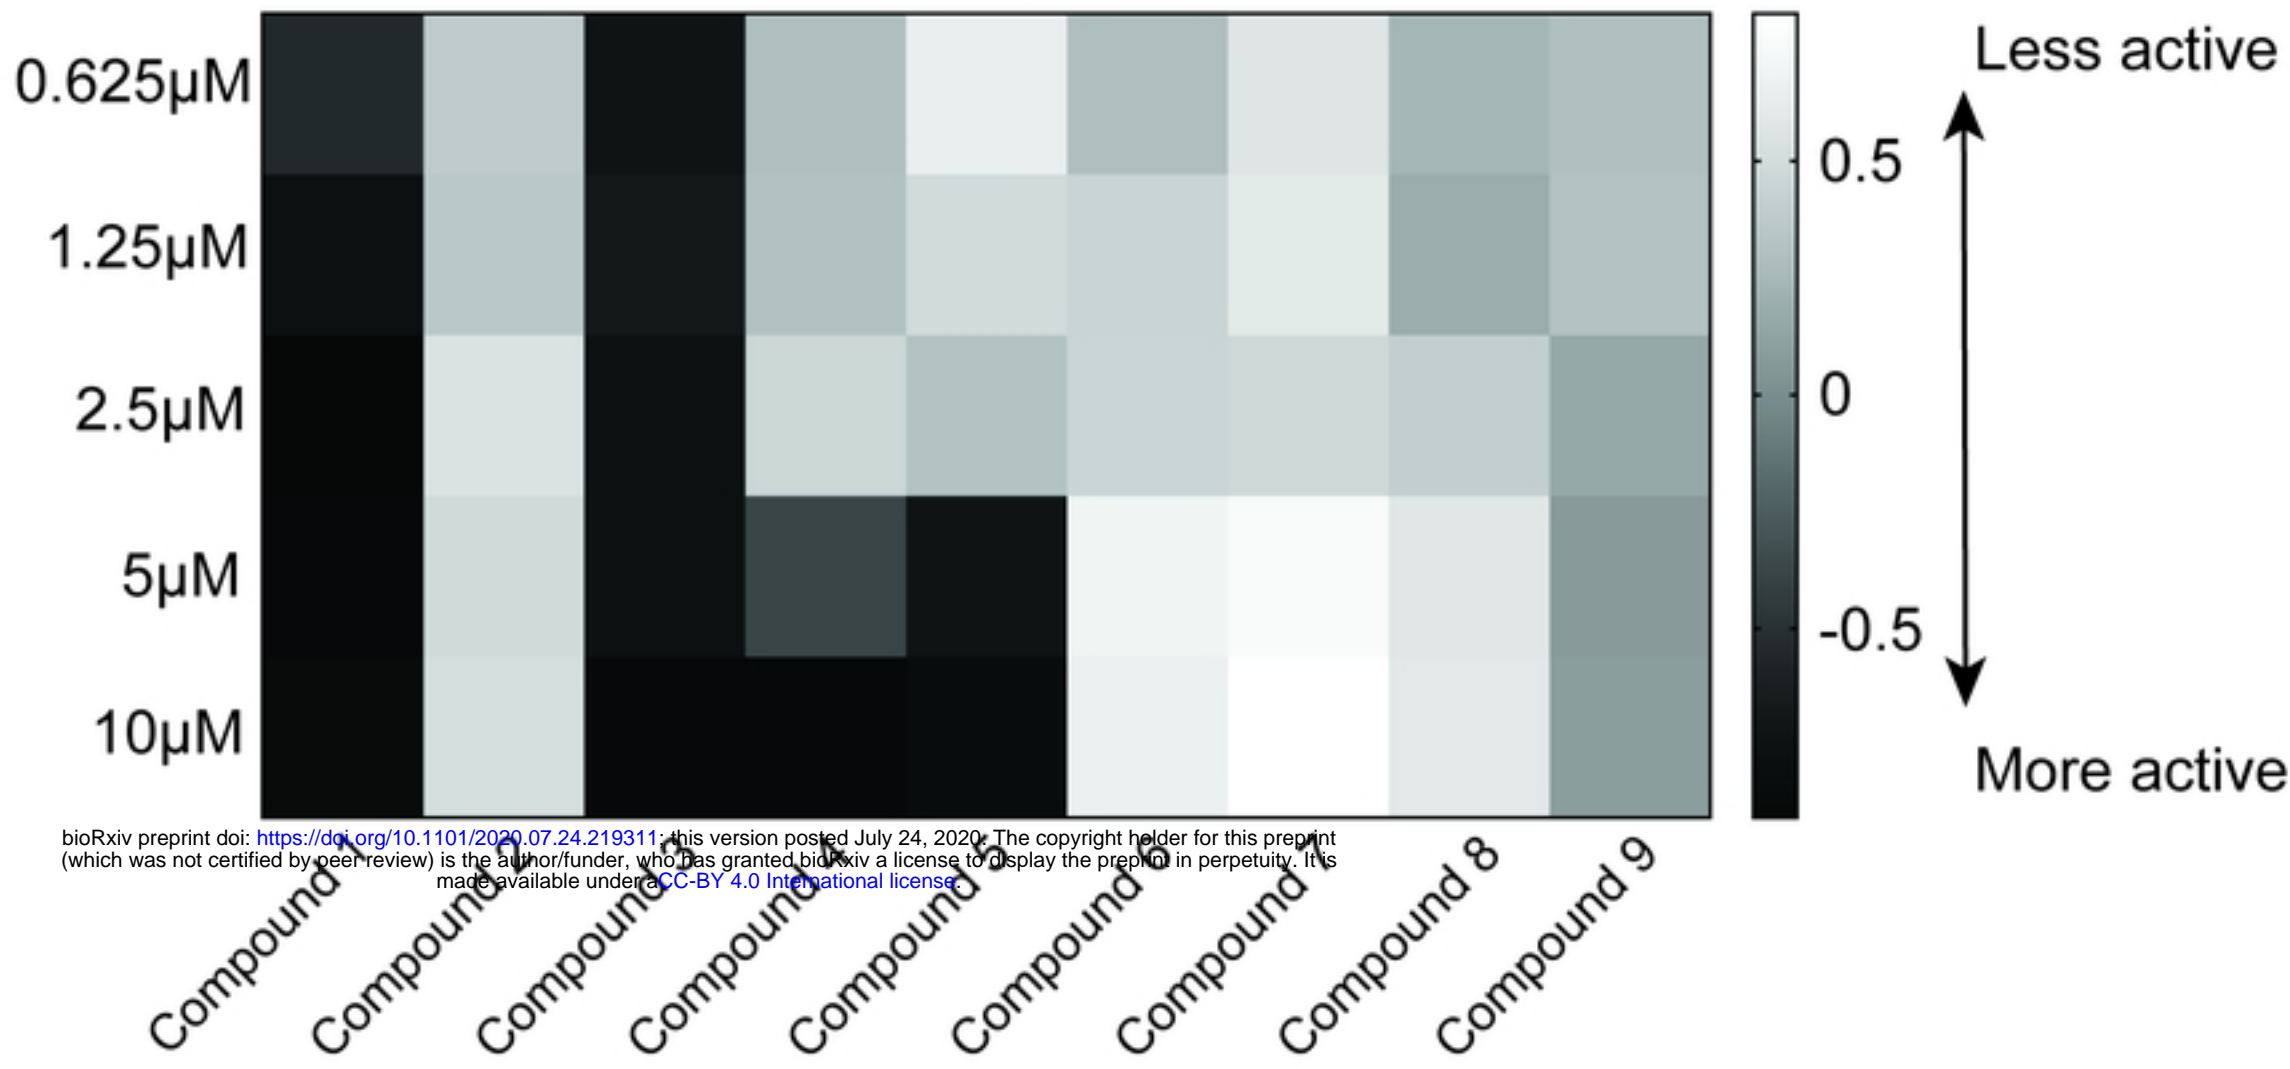**B**

### Schistosomula Phenotype Titration Scores

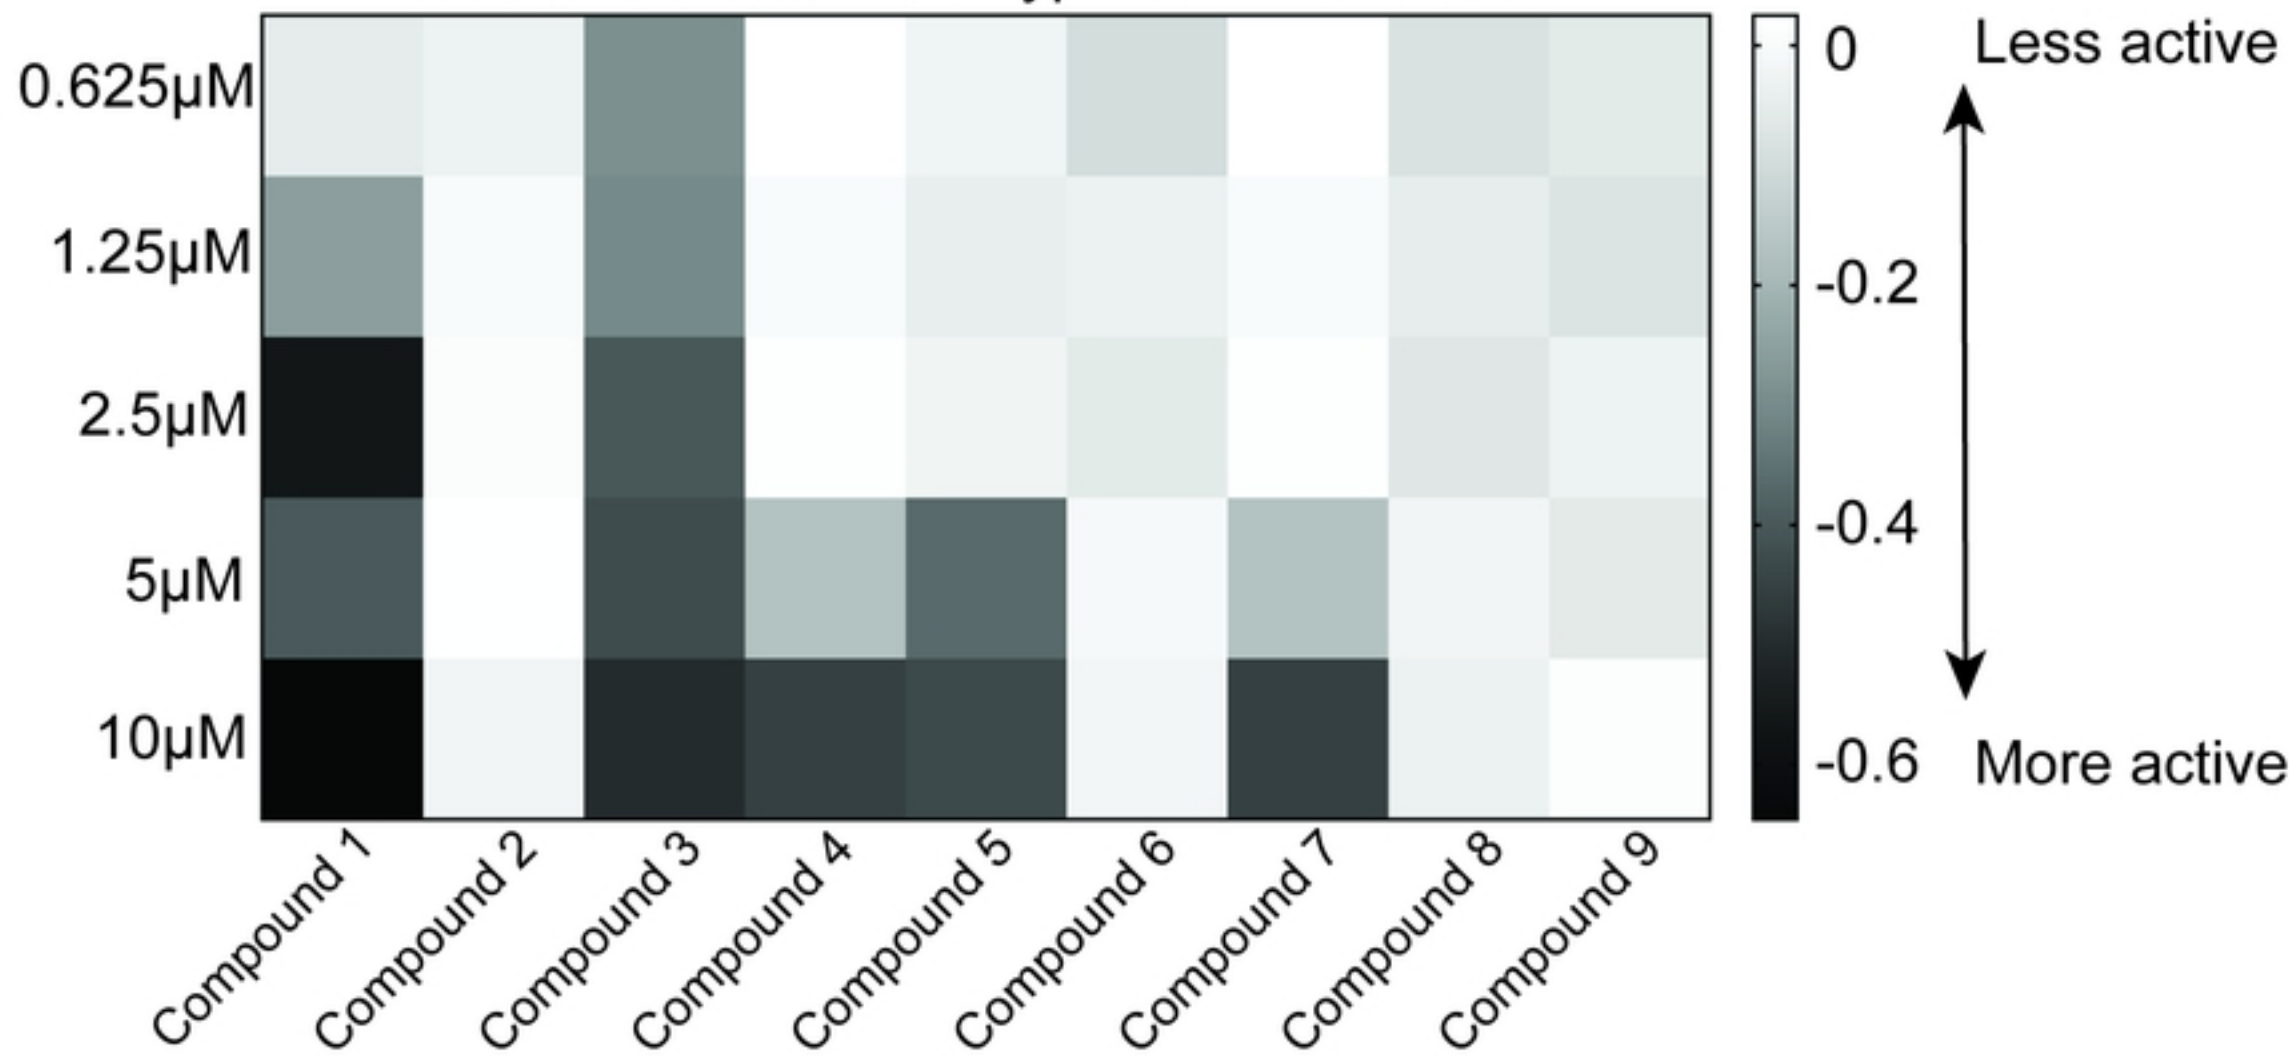**Figure 2**

## Compound 1 Juvenile Worm Titration

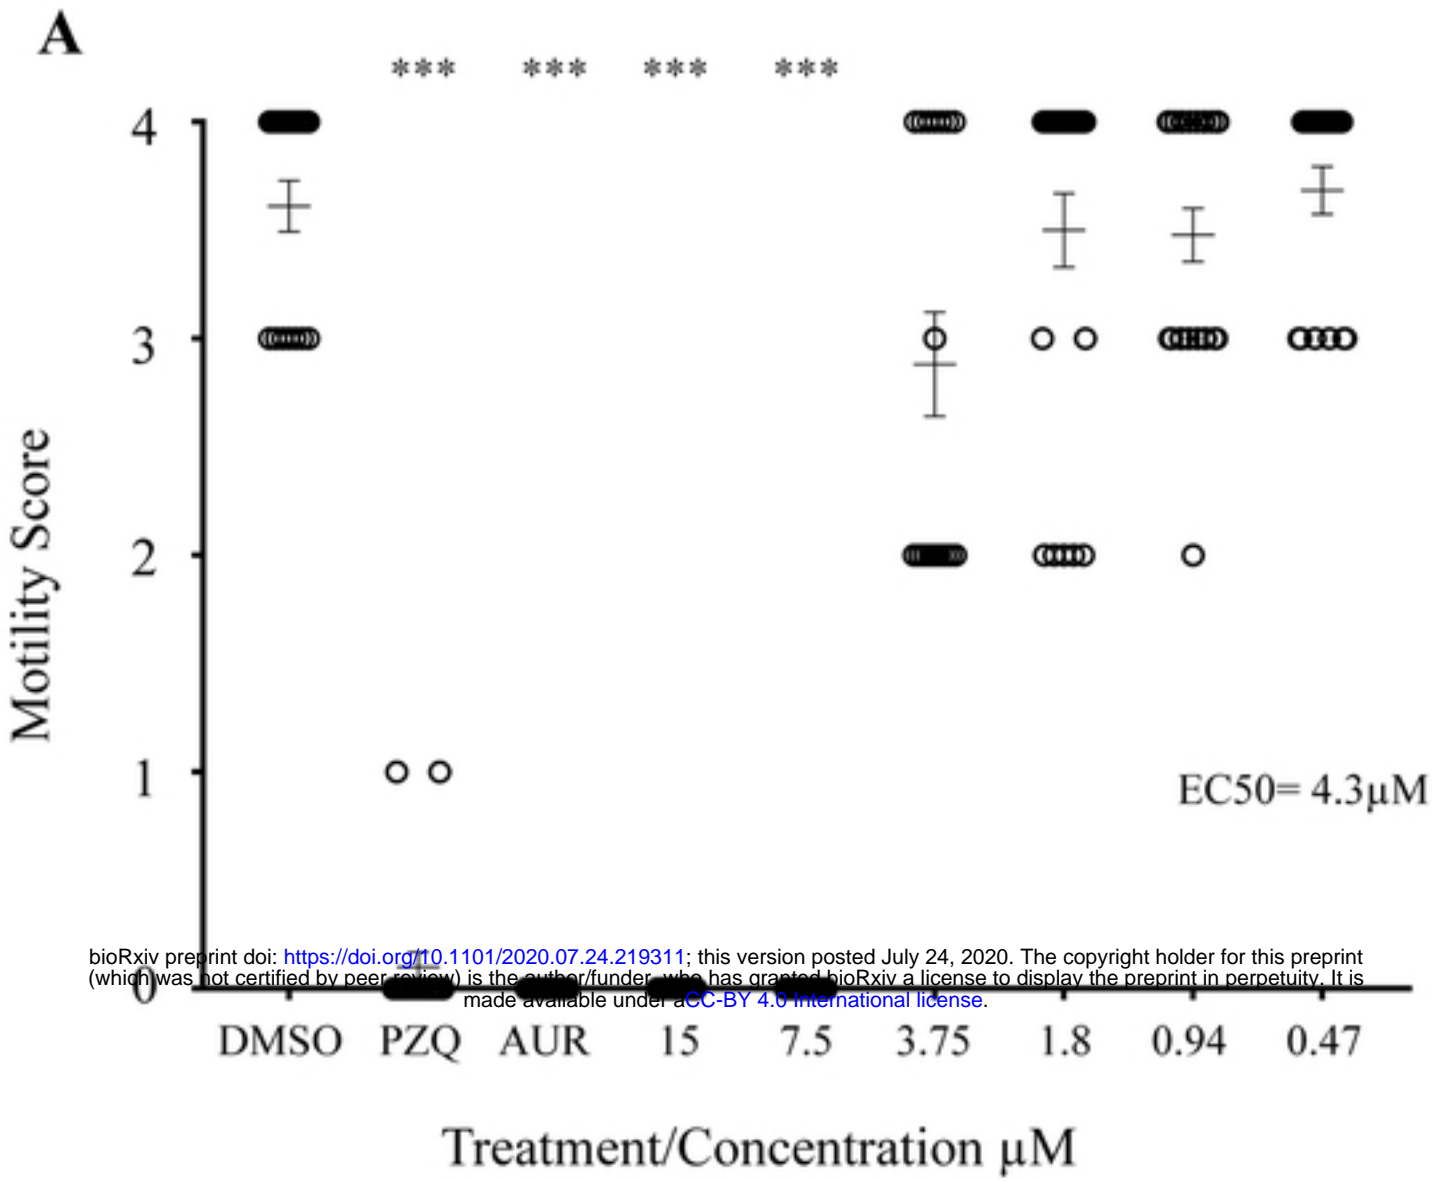

## Compound 3 Juvenile Worm Titration

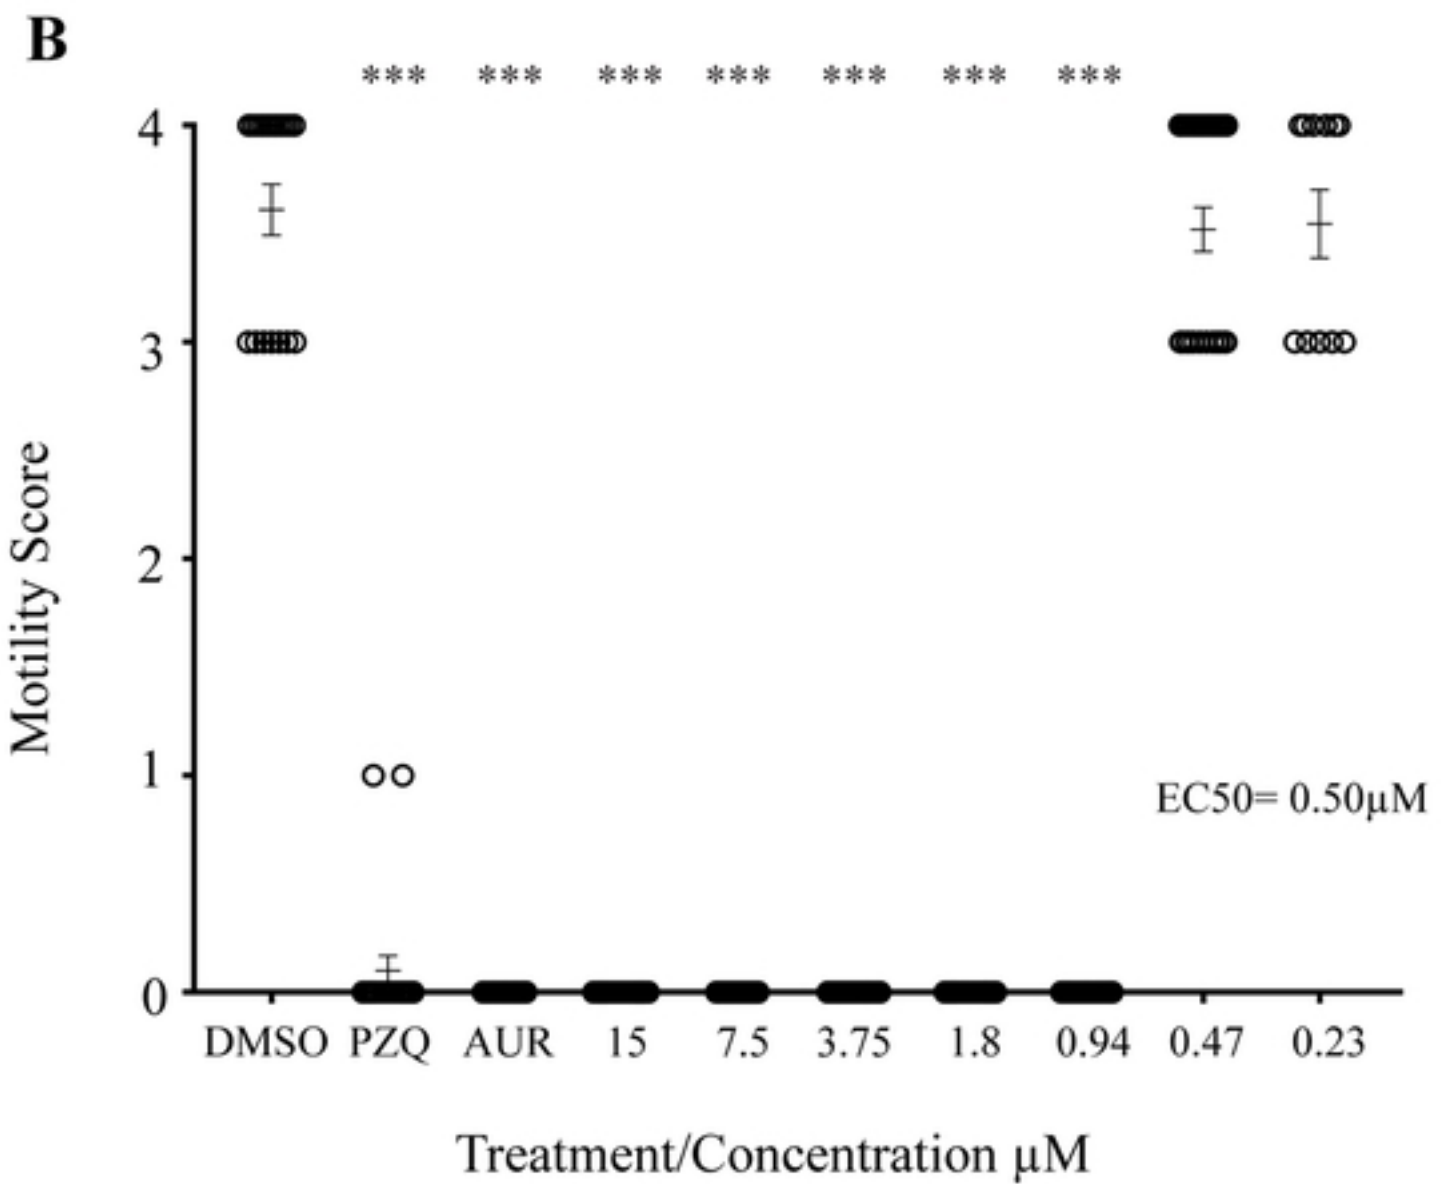

Figure 4



**A**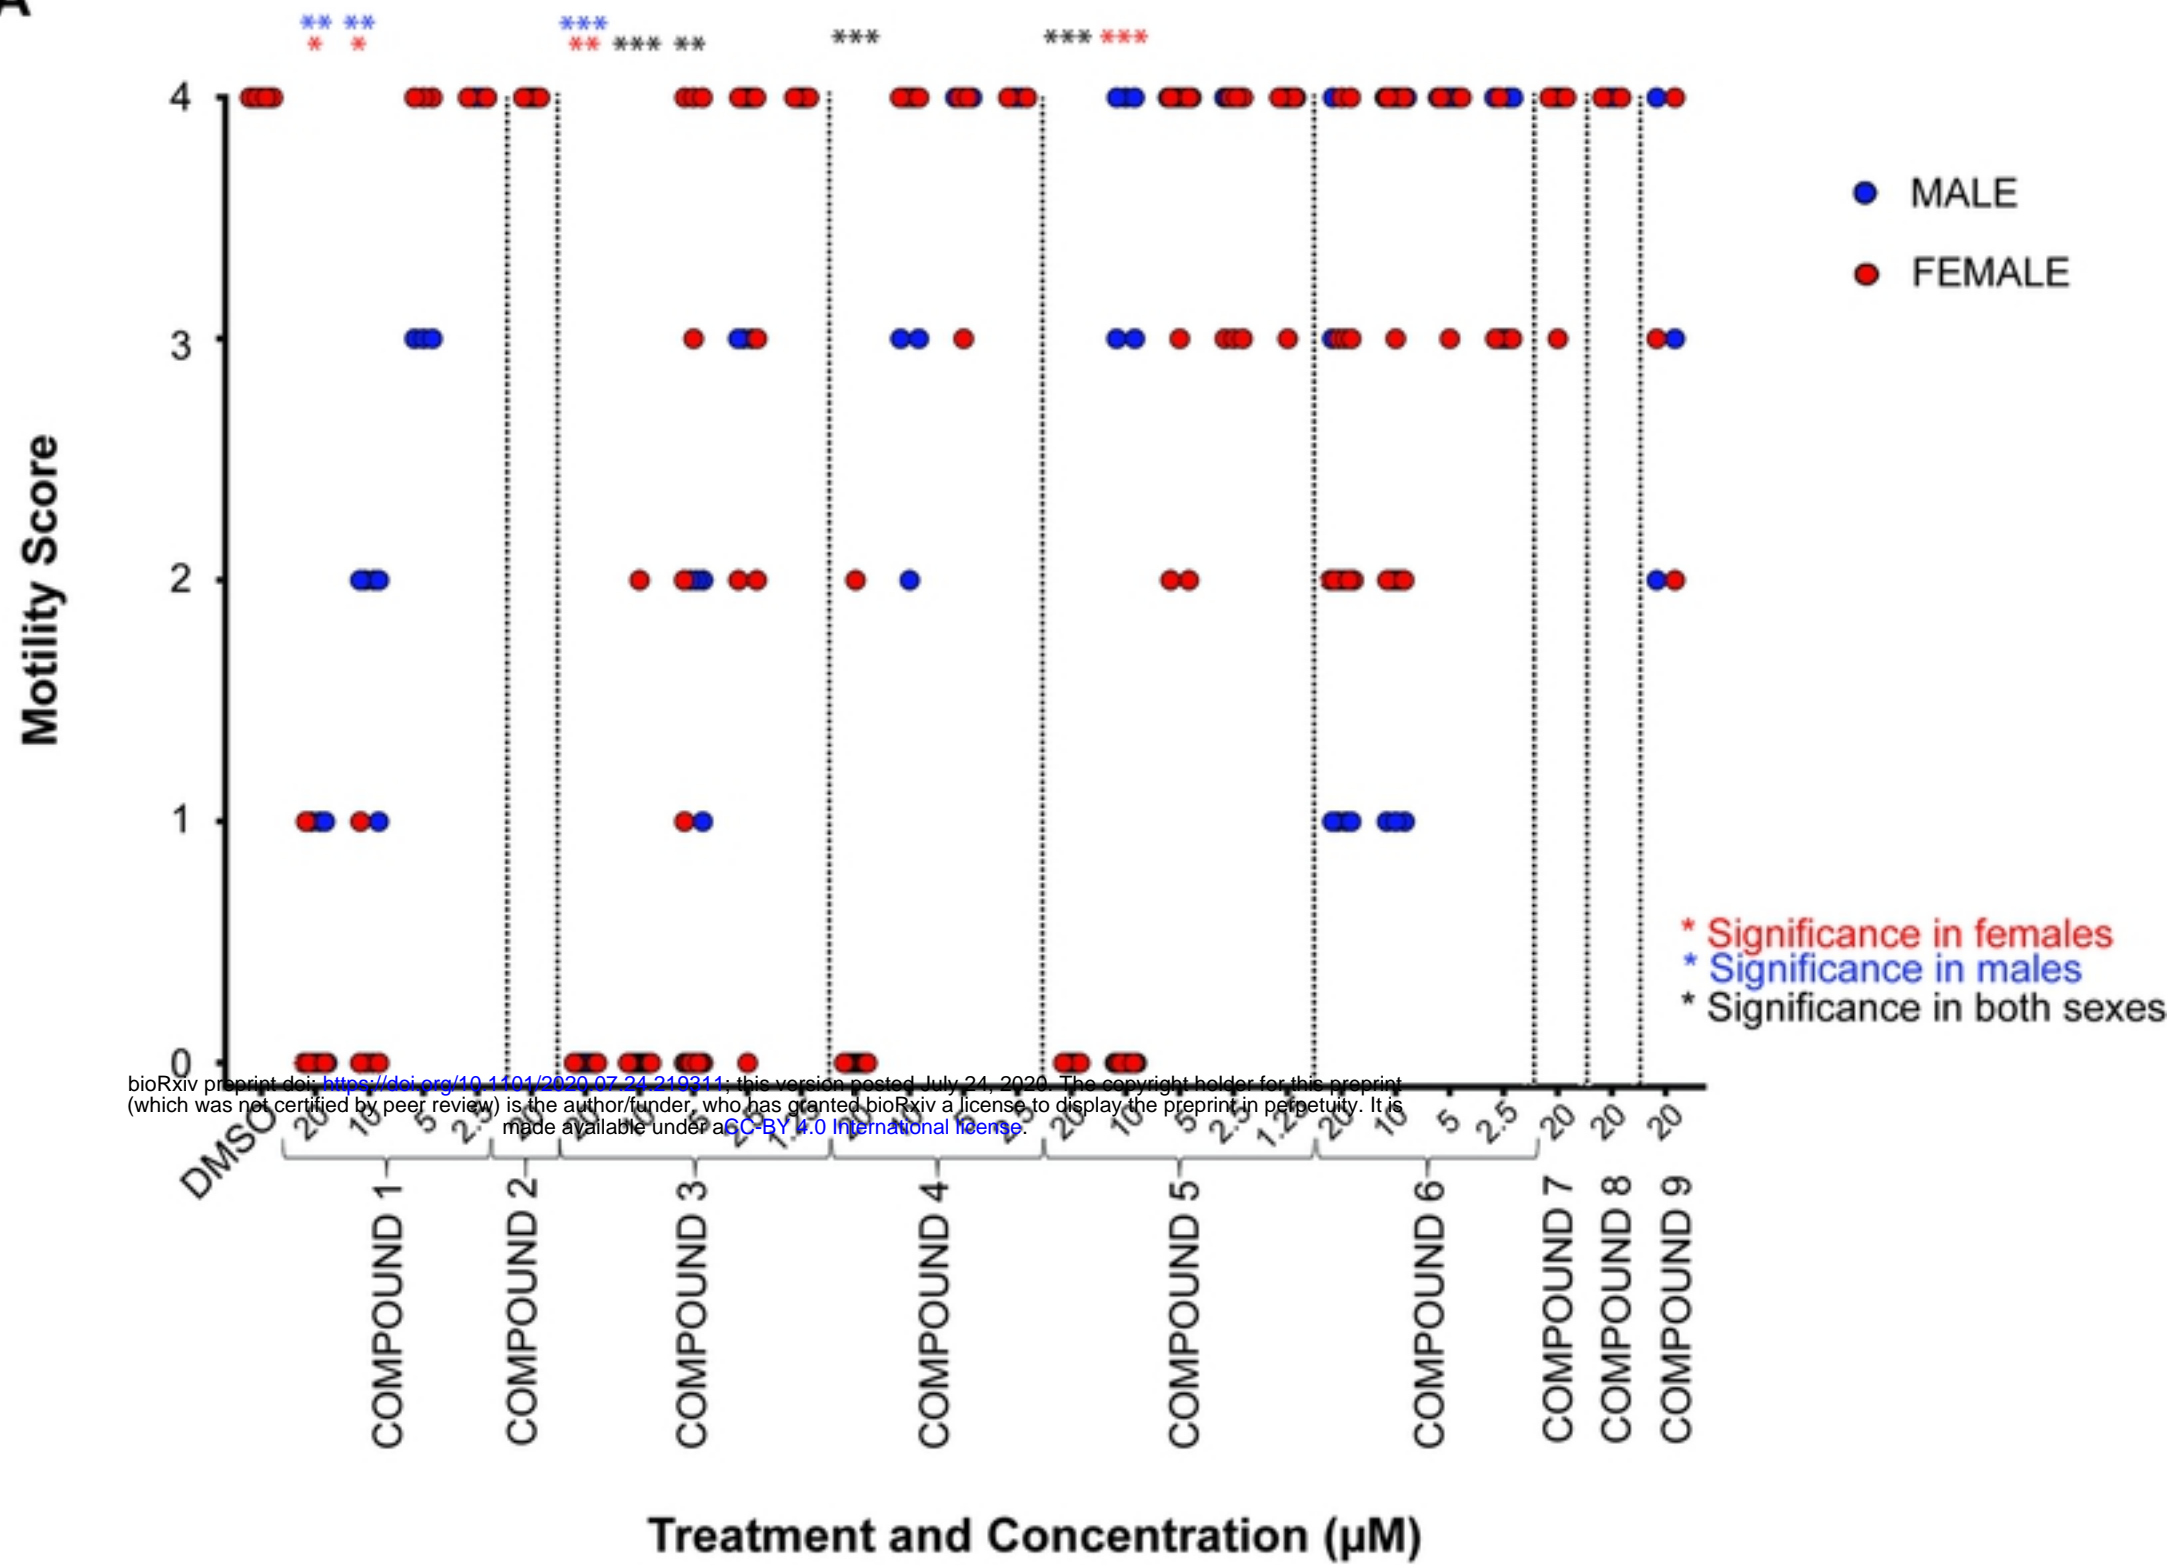**B**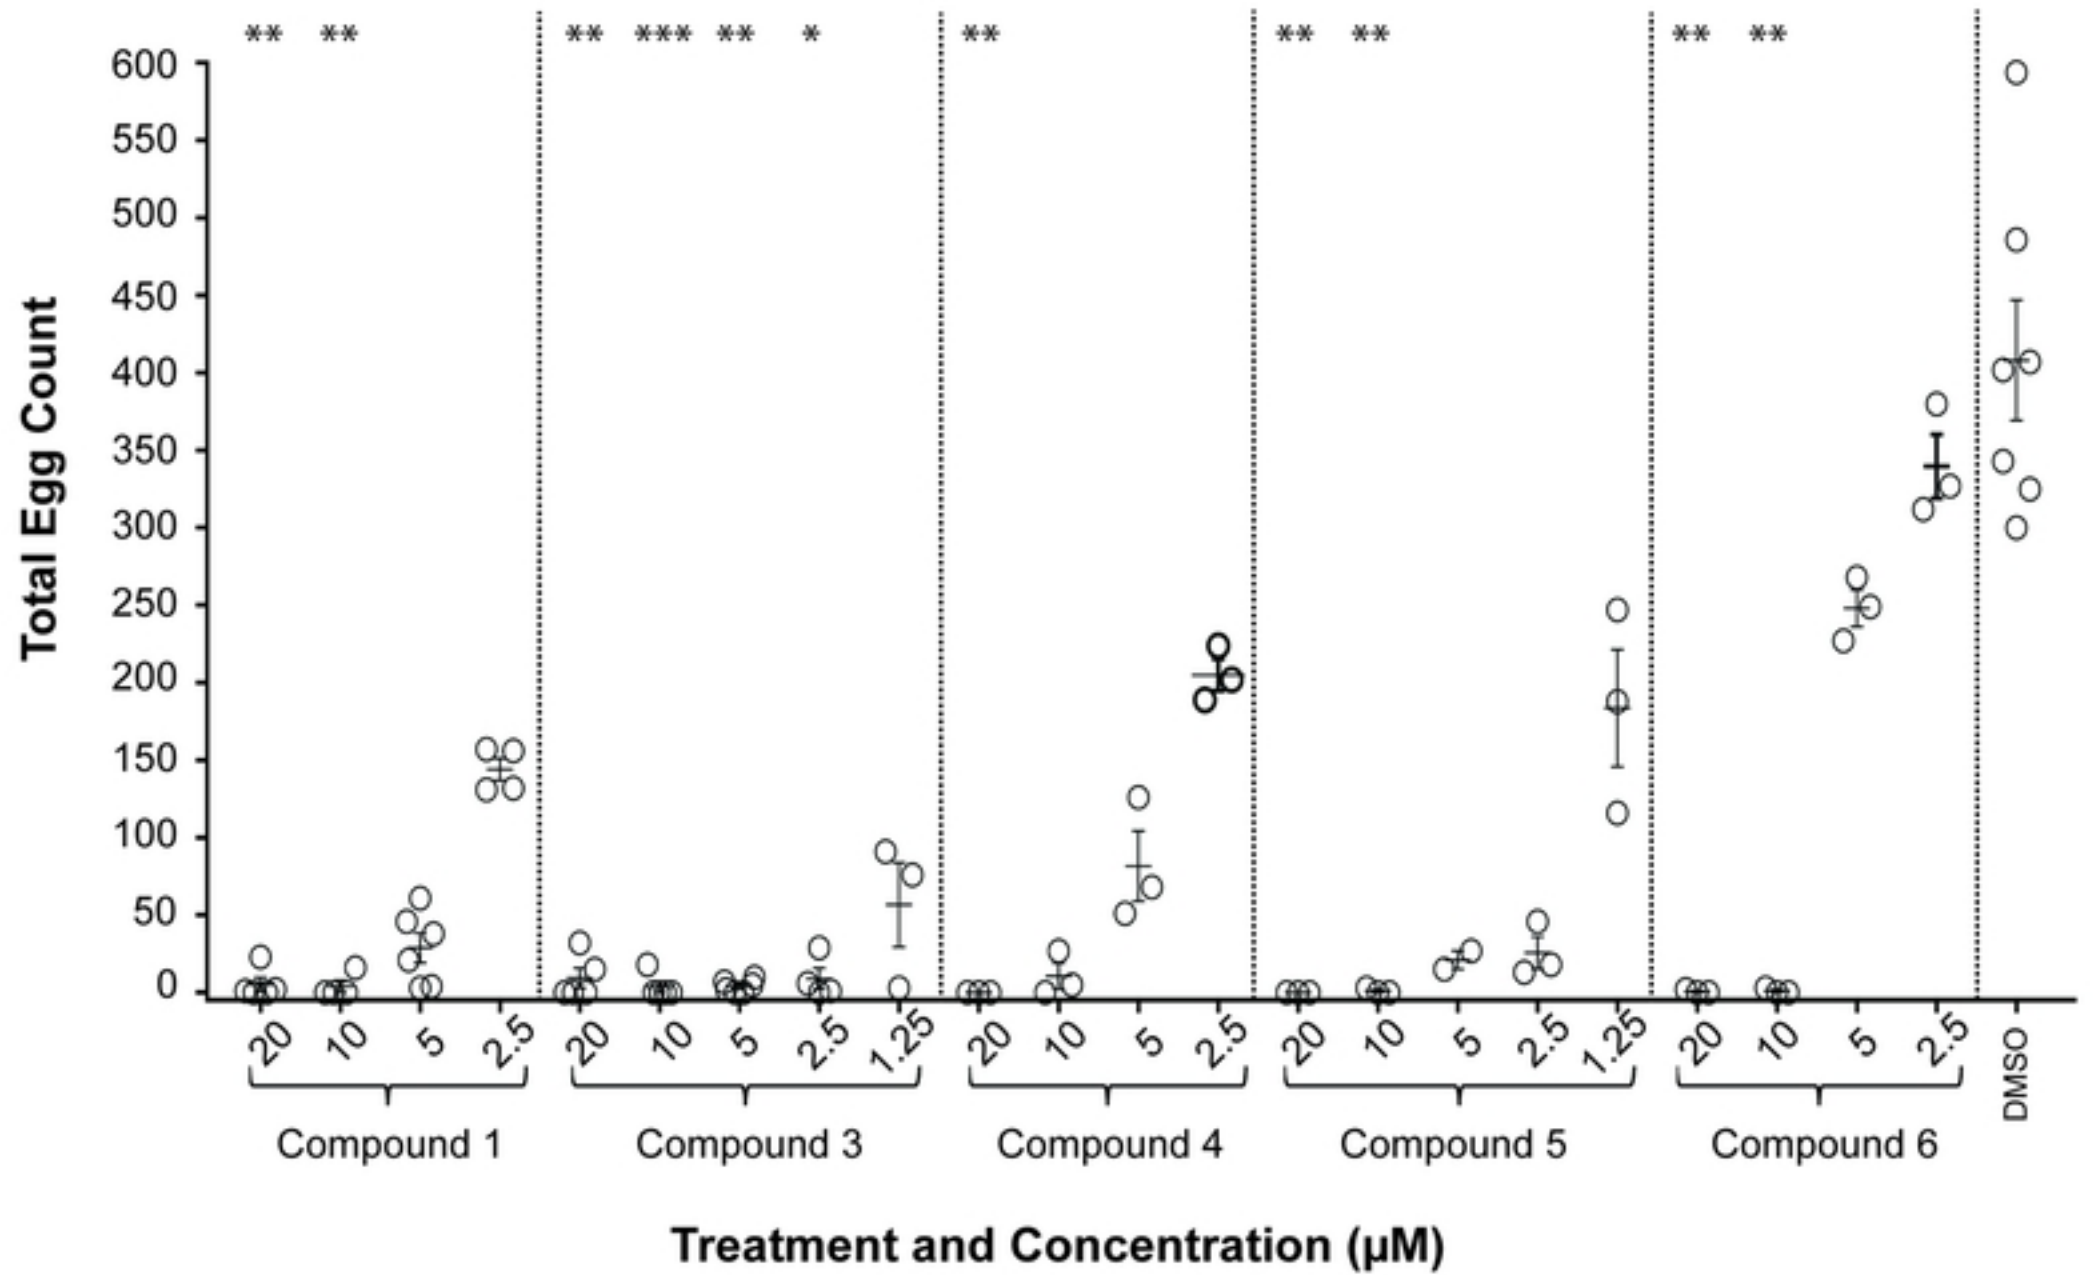

Figure 3

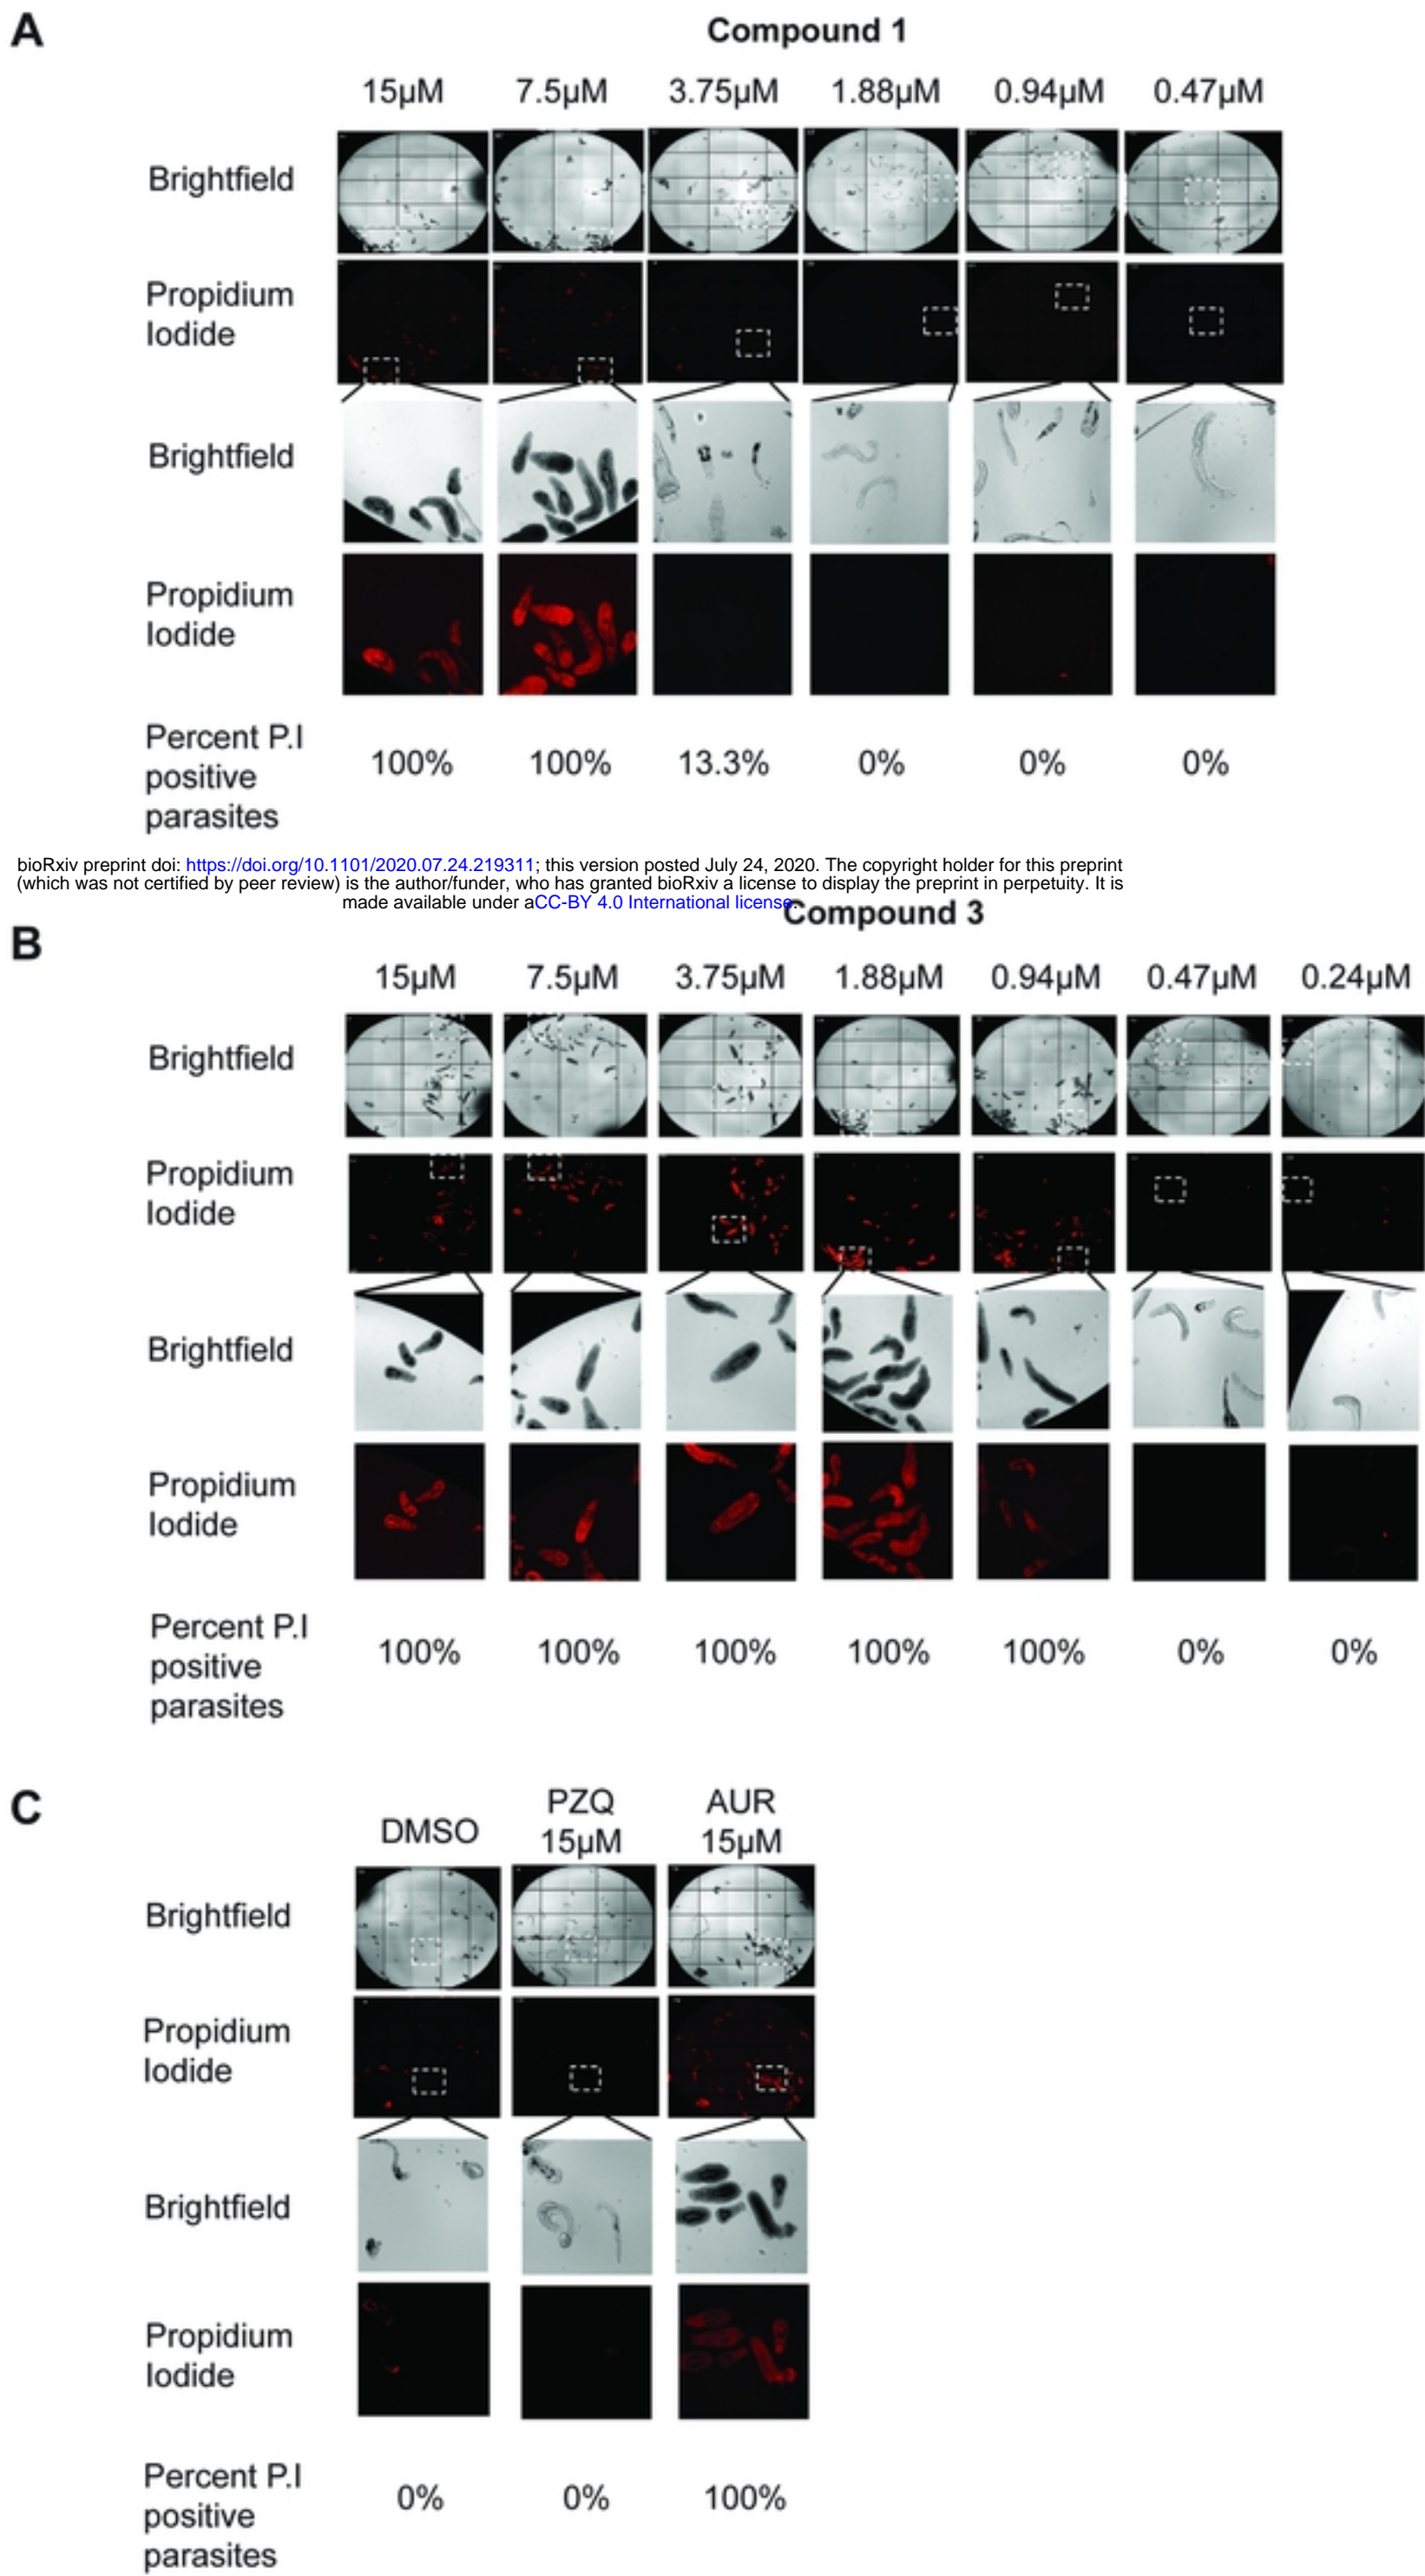

Figure 5

A

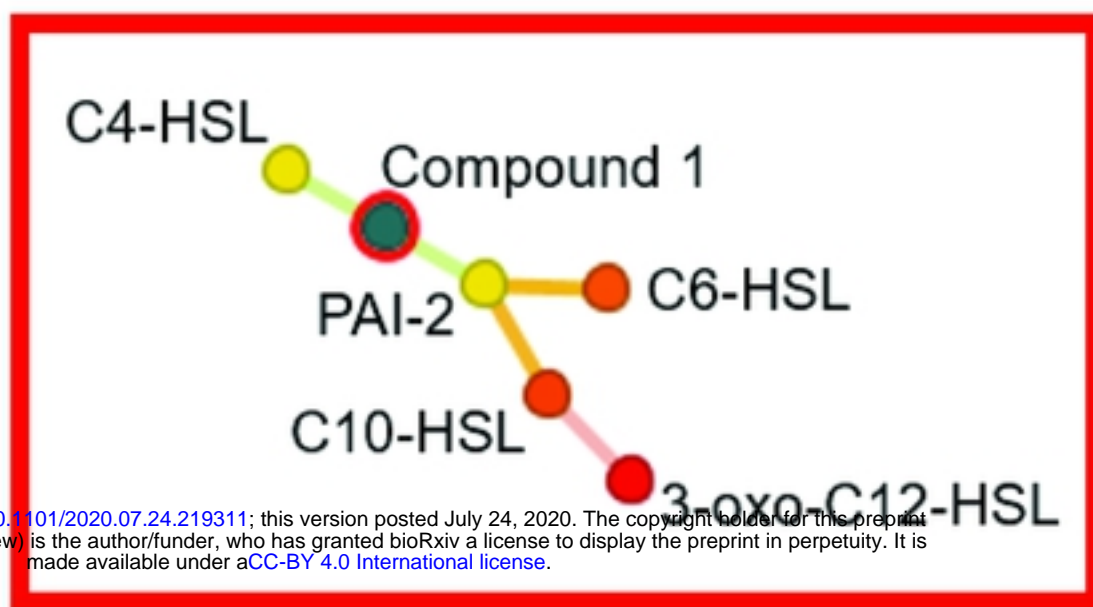

bioRxiv preprint doi: <https://doi.org/10.1101/2020.07.24.219311>; this version posted July 24, 2020. The copyright holder for this preprint (which was not certified by peer review) is the author/funder, who has granted bioRxiv a license to display the preprint in perpetuity. It is made available under aCC-BY 4.0 International license.

C4-HSL

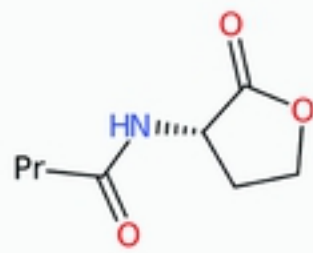

Compound 1

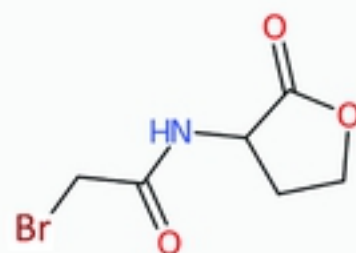

PAI-2

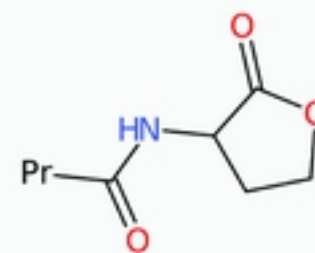

B

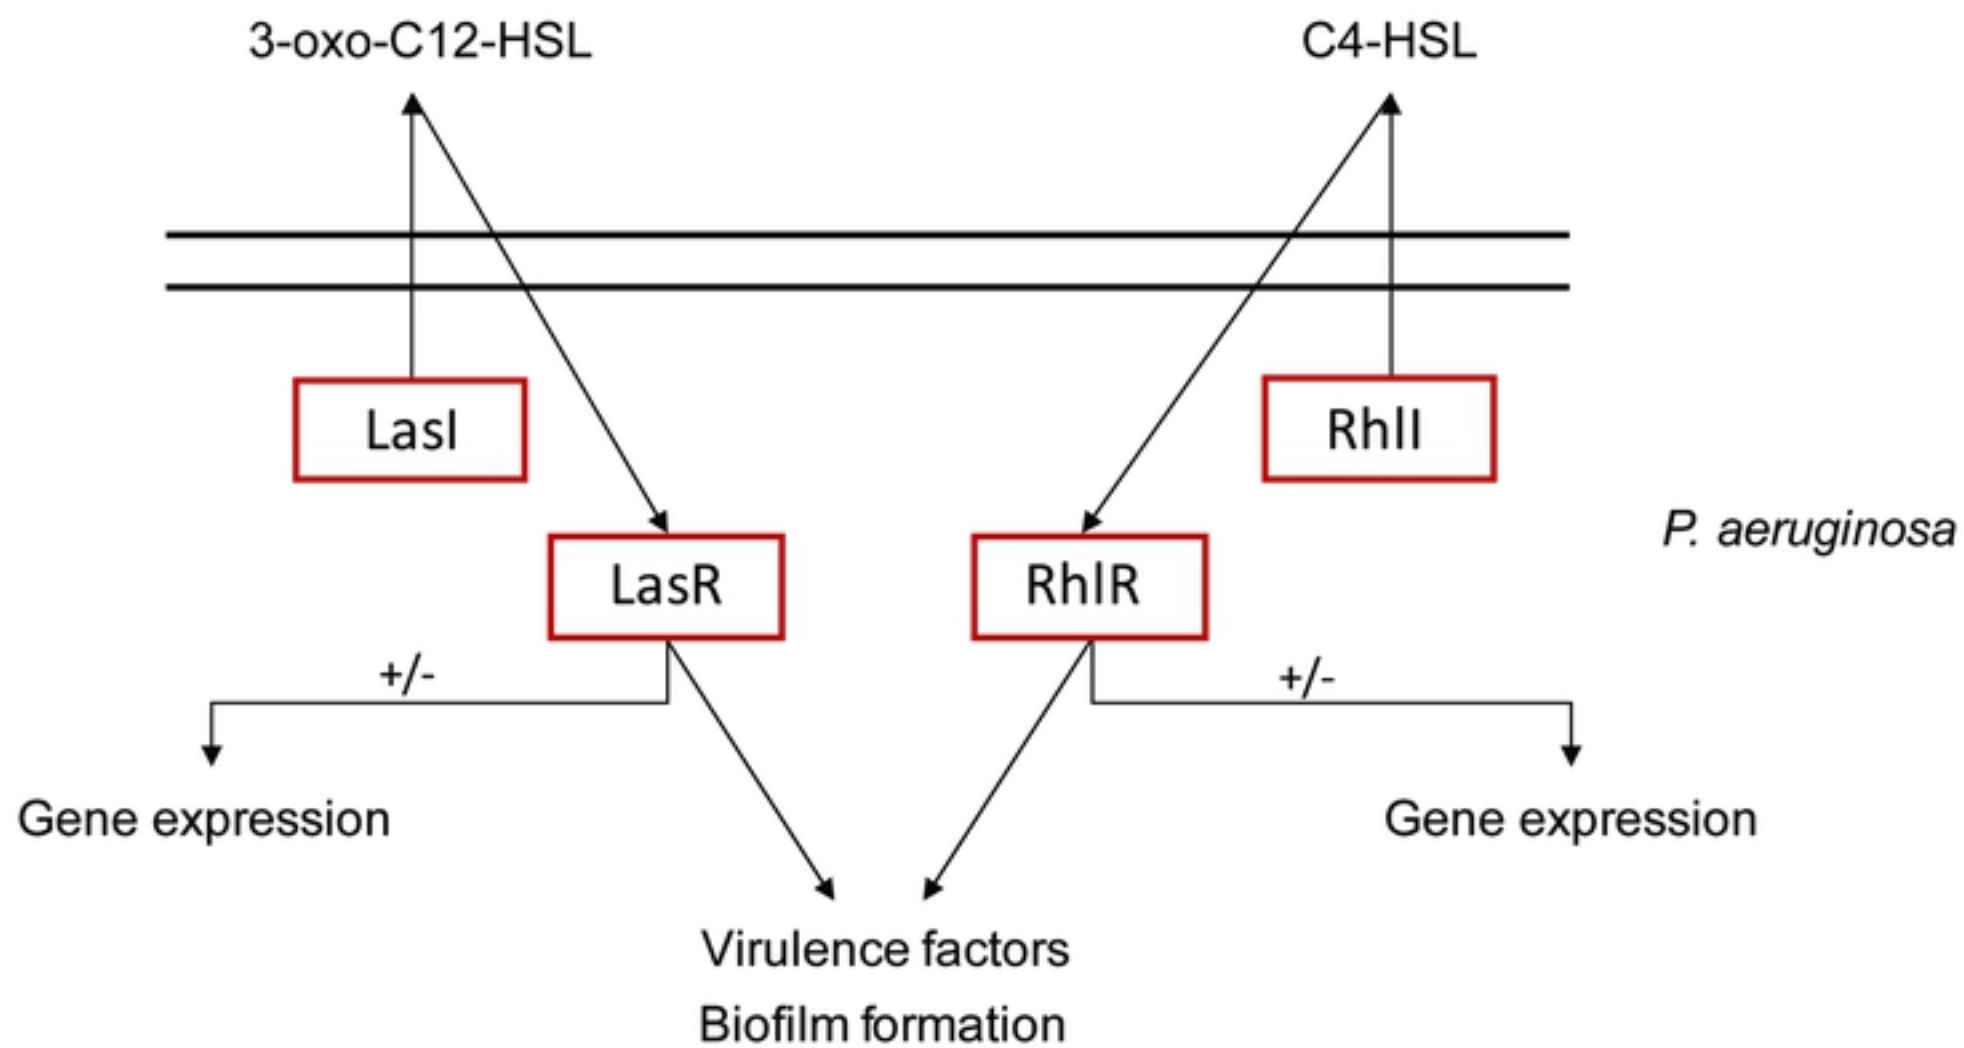

Figure 6
